# Supplementary material for: New sesquiterpenoids from the South China Sea soft corals Clavularia viridis and Lemnalia flava
Source: publisher site journal article supplement (doi:10.3762/bjoc.15.64), 2019-03-15
Supplement: Additional file 1 [file 1860-5397-15-64-S1.pdf]

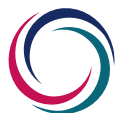

## Supporting Information

for

### **New sesquiterpenoids from the South China Sea soft corals *Clavularia viridis* and *Lemnalia flava***

Qihao Wu, Yuan Gao, Meng-Meng Zhang, Li Sheng, Jia Li, Xu-Wen Li, Hong Wang  
and Yue-Wei Guo

*Beilstein J. Org. Chem.* **2019**, *15*, 695–702. doi:10.3762/bjoc.15.64

### **Spectral data of compounds 1–4 and 7**

## Contents

- Figure S1:**  $^1\text{H}$  NMR spectrum (500 MHz,  $\text{CDCl}_3$ ) of **1**
- Figure S2:**  $^{13}\text{C}$  NMR spectrum (125 MHz,  $\text{CDCl}_3$ ) of **1**
- Figure S3:**  $^1\text{H}$ ,  $^1\text{H}$  COSY spectrum (500 MHz,  $\text{CDCl}_3$ ) of **1**
- Figure S4:** HMQC spectrum (500 MHz,  $\text{CDCl}_3$ ) of **1**
- Figure S5:** HMBC spectrum (500 MHz,  $\text{CDCl}_3$ ) of **1**
- Figure S6:** NOESY spectrum (500 MHz,  $\text{CDCl}_3$ ) of **1**
- Figure S7:** IR spectrum of **1**
- Figure S8:** HR-ESIMS spectrum of **1**
- Figure S9:**  $^1\text{H}$  NMR spectrum (500 MHz,  $\text{CDCl}_3$ ) of **2**
- Figure S10:**  $^{13}\text{C}$  NMR spectrum (125 MHz,  $\text{CDCl}_3$ ) of **2**
- Figure S11:**  $^1\text{H}$ ,  $^1\text{H}$  COSY spectrum (500 MHz,  $\text{CDCl}_3$ ) of **2**
- Figure S12:** HMQC spectrum (500 MHz,  $\text{CDCl}_3$ ) of **2**
- Figure S13:** HMBC spectrum (500 MHz,  $\text{CDCl}_3$ ) of **2**
- Figure S14:** NOESY spectrum (500 MHz,  $\text{CDCl}_3$ ) of **2**
- Figure S15:** IR spectrum of **2**
- Figure S16:** HRESIMS spectrum of **2**
- Figure S17:**  $^1\text{H}$  NMR spectrum (500 MHz,  $\text{CDCl}_3$ ) of **3**
- Figure S18:**  $^{13}\text{C}$  NMR spectrum (125 MHz,  $\text{CDCl}_3$ ) of **3**
- Figure S19:**  $^1\text{H}$ ,  $^1\text{H}$  COSY spectrum (500 MHz,  $\text{CDCl}_3$ ) of **3**
- Figure S20:** HMQC spectrum (500 MHz,  $\text{CDCl}_3$ ) of **3**
- Figure S21:** HMBC spectrum (500 MHz,  $\text{CDCl}_3$ ) of **3**
- Figure S22:** NOESY spectrum (500 MHz,  $\text{CDCl}_3$ ) of **3**
- Figure S23:** IR spectrum of **3**

- Figure S24:** HR-EIMS spectrum of **3**
- Figure S25:**  $^1\text{H}$  NMR spectrum (500 MHz,  $\text{CDCl}_3$ ) of **4**
- Figure S26:**  $^{13}\text{C}$  NMR spectrum (125 MHz,  $\text{CDCl}_3$ ) of **4**
- Figure S27:**  $^1\text{H}, ^1\text{H}$  COSY spectrum (500 MHz,  $\text{CDCl}_3$ ) of **4**
- Figure S28:** HMQC spectrum (500 MHz,  $\text{CDCl}_3$ ) of **4**
- Figure S29:** HMBC spectrum (500 MHz,  $\text{CDCl}_3$ ) of **4**
- Figure S30:** NOESY spectrum (500 MHz,  $\text{CDCl}_3$ ) of **4**
- Figure S31:** IR spectrum of **4**
- Figure S32:** HR-ESIMS spectrum of **4**
- Figure S33:**  $^1\text{H}$  NMR spectrum (500 MHz,  $\text{CDCl}_3$ ) of **6**
- Figure S34:**  $^{13}\text{C}$  NMR spectrum (125 MHz,  $\text{CDCl}_3$ ) of **6**
- Figure S35:**  $^1\text{H}, ^1\text{H}$  COSY spectrum (500 MHz,  $\text{CDCl}_3$ ) of **6**
- Figure S36:** HMQC spectrum (500 MHz,  $\text{CDCl}_3$ ) of **6**
- Figure S37:** HMBC spectrum (500 MHz,  $\text{CDCl}_3$ ) of **6**
- Figure S38:** NOESY spectrum (500 MHz,  $\text{CDCl}_3$ ) of **6**
- Figure S39:** IR spectrum of **6**
- Figure S40:** HR-EIMS spectrum of **6**

**Figure S1:**  $^1\text{H}$  NMR spectrum (500 MHz,  $\text{CDCl}_3$ ) of **1**.

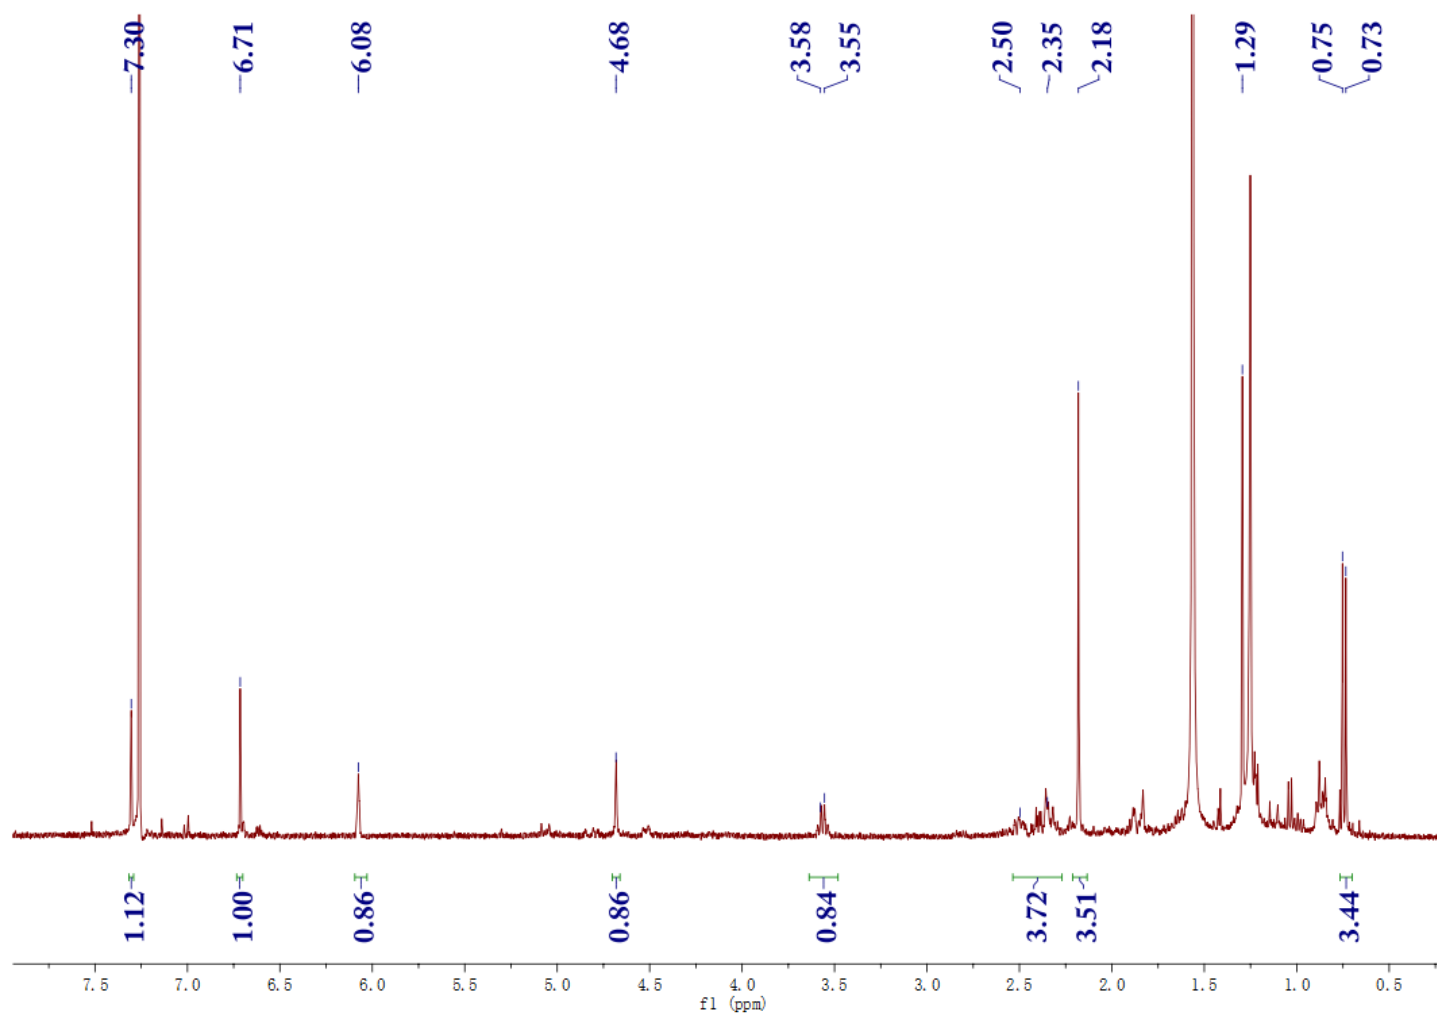

**Figure S2:**  $^{13}\text{C}$  NMR spectrum (125 MHz,  $\text{CDCl}_3$ ) of **1**.

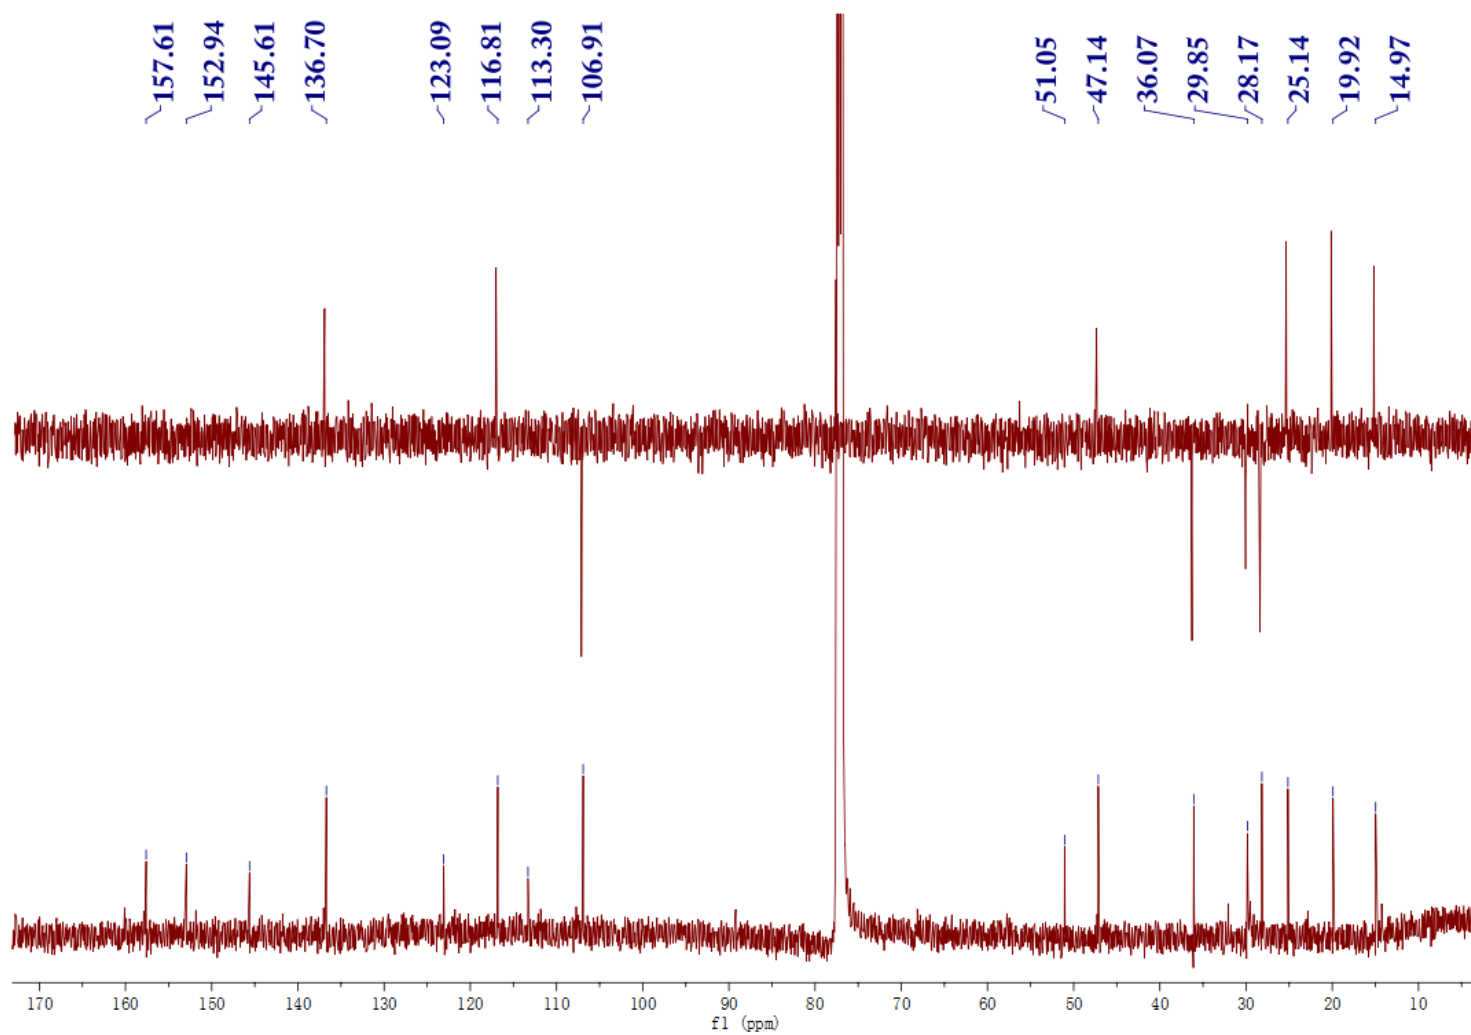

**Figure S3:**  $^1\text{H}, ^1\text{H}$  COSY spectrum (500 MHz,  $\text{CDCl}_3$ ) of **1**.

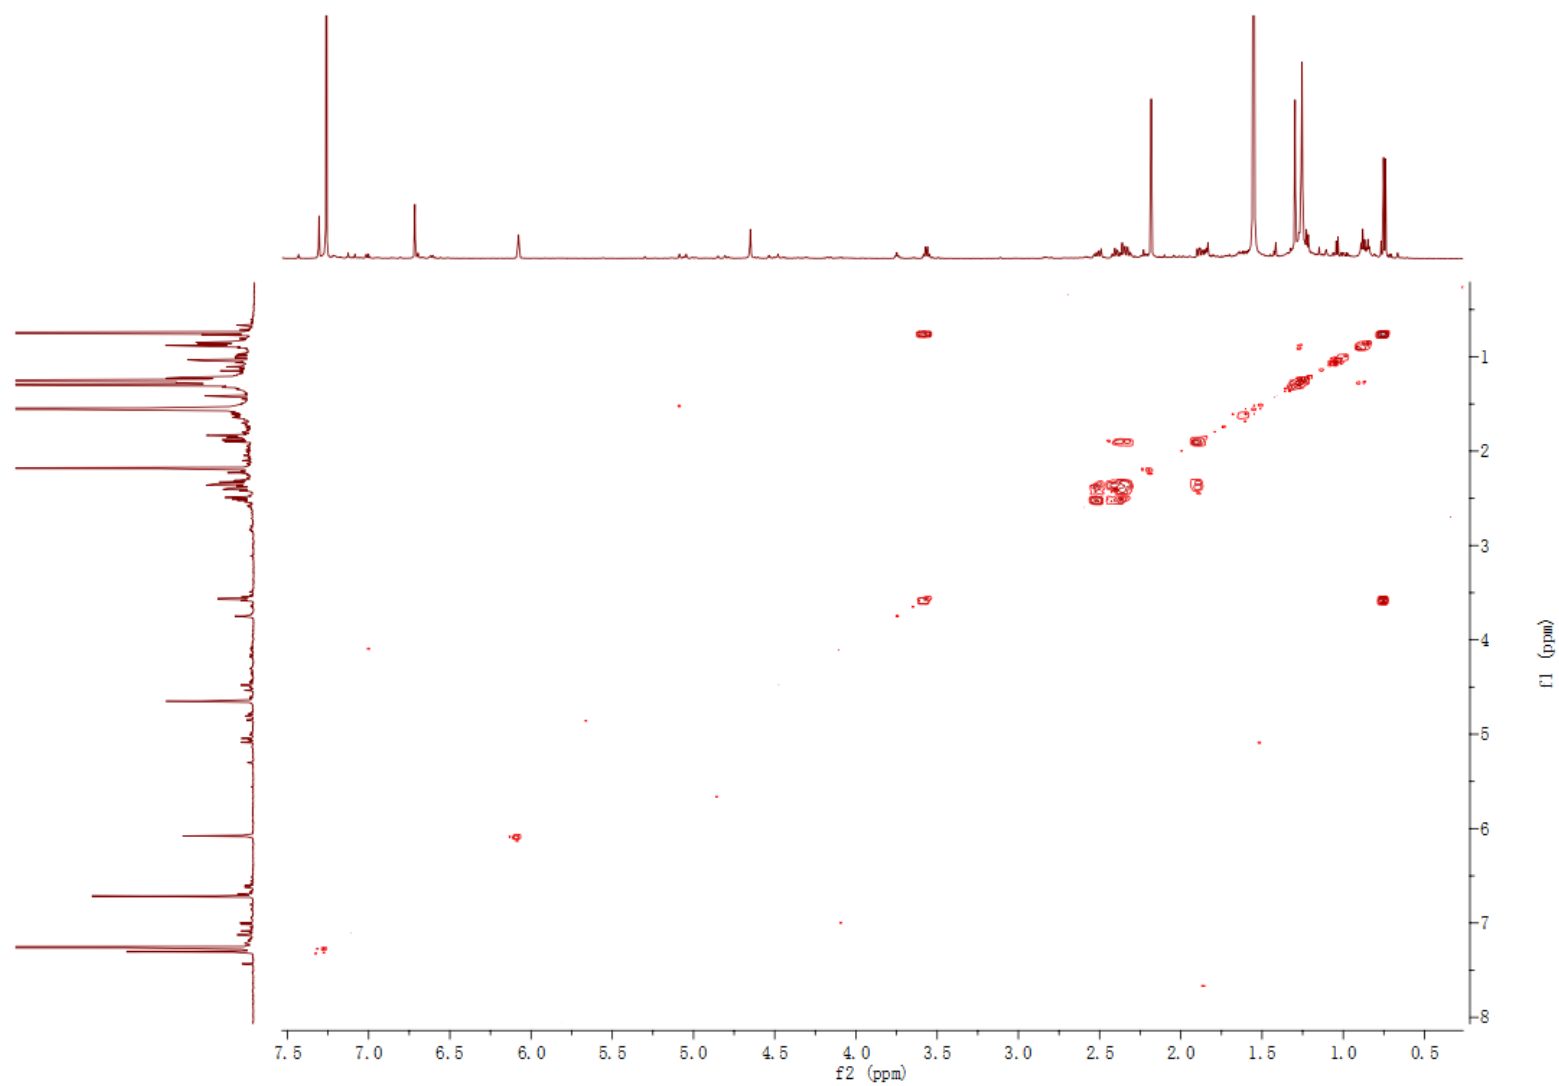

**Figure S4:** HMQC spectrum (500 MHz, CDCl<sub>3</sub>) of **1**.

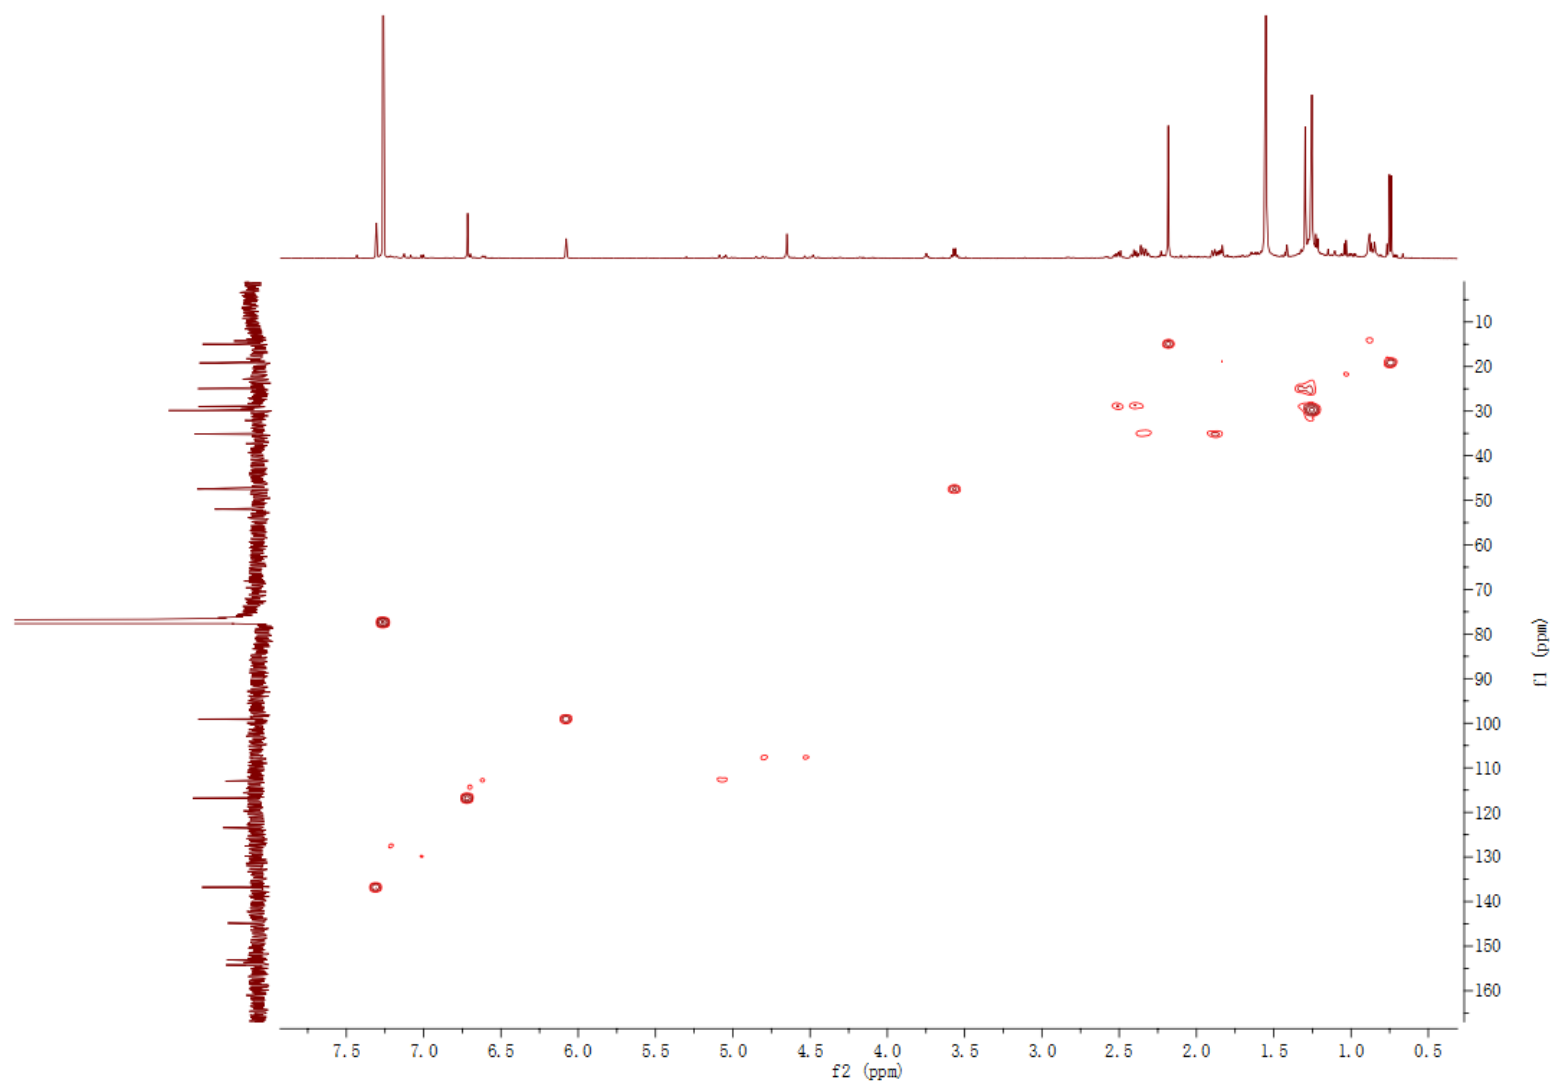

**Figure S5:** HMBC spectrum (500 MHz, CDCl<sub>3</sub>) of **1**.

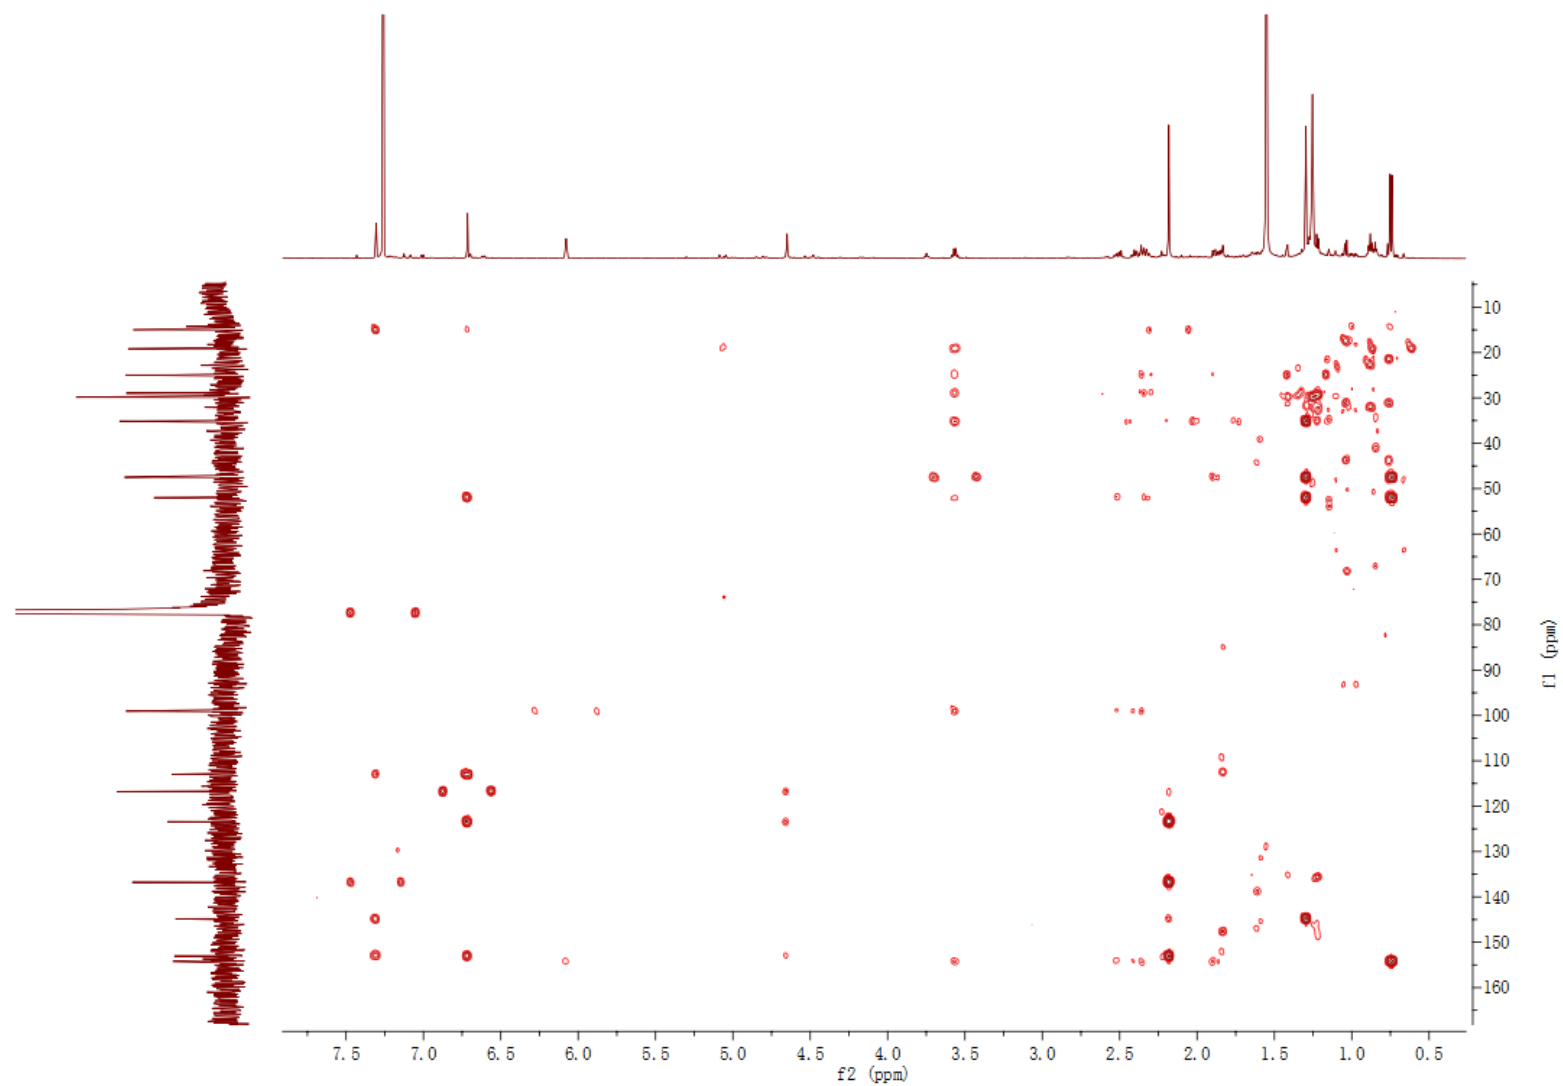



**Figure S6:** NOESY spectrum (500 MHz,  $\text{CDCl}_3$ ) of **1**.

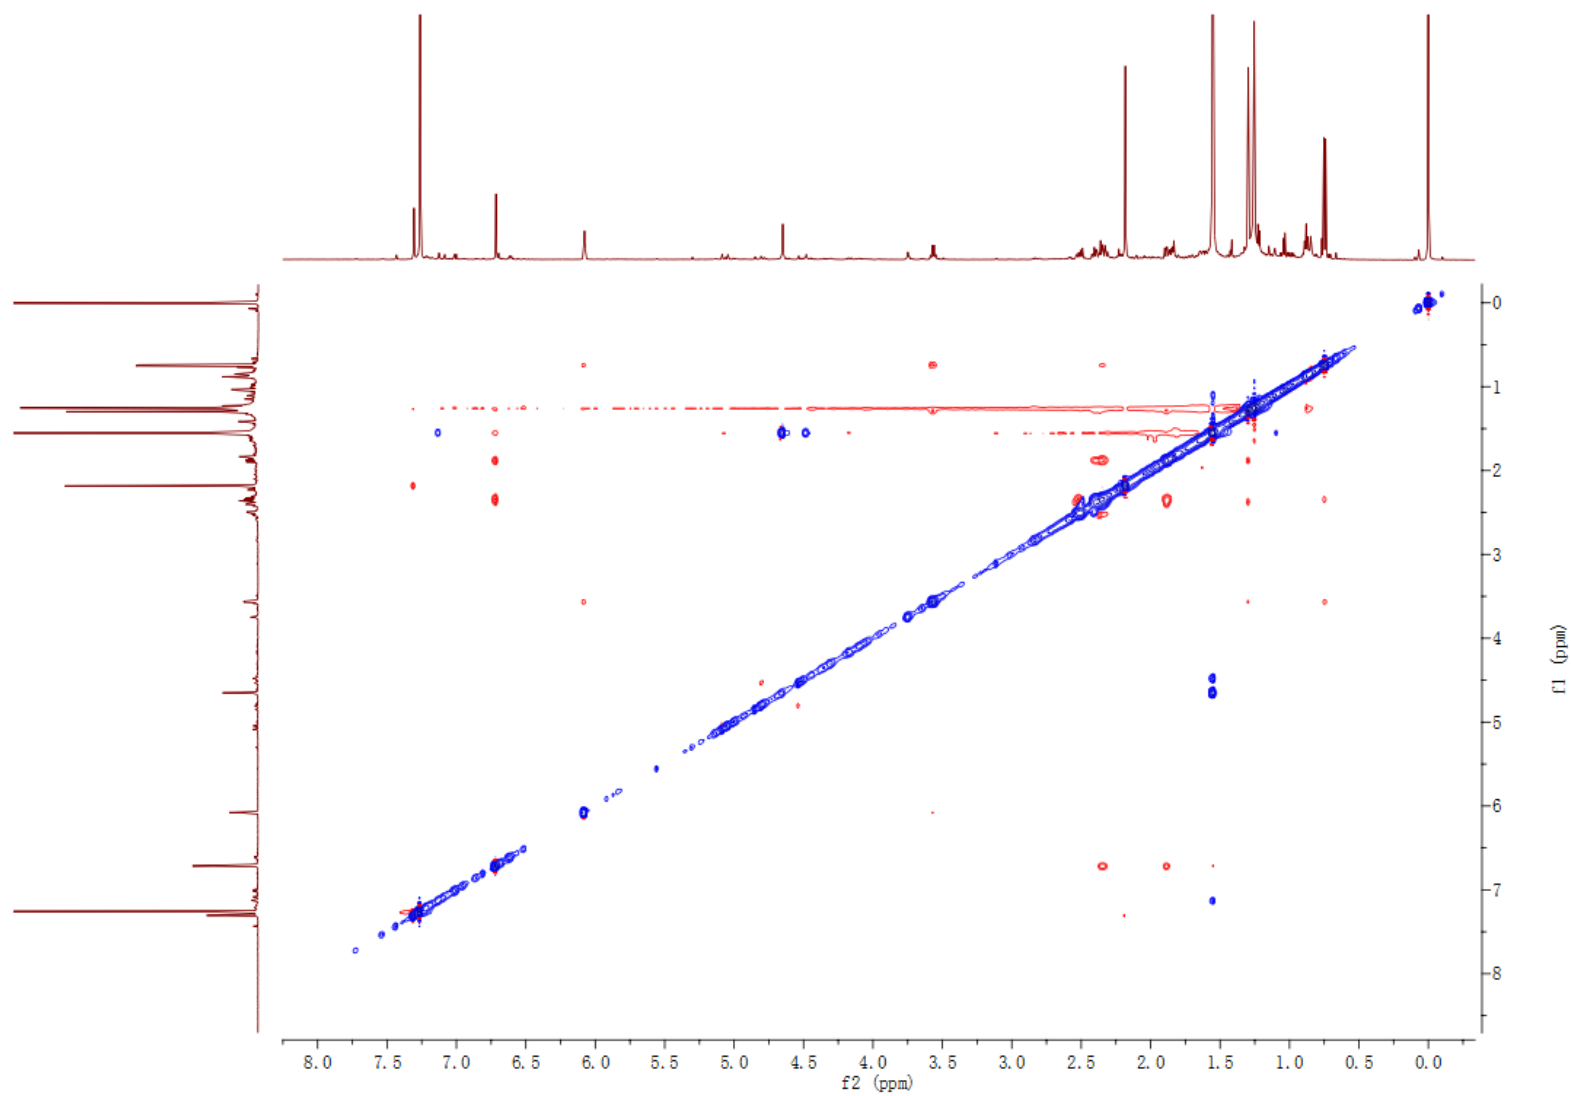

**Figure S7:** IR spectrum of **1**.

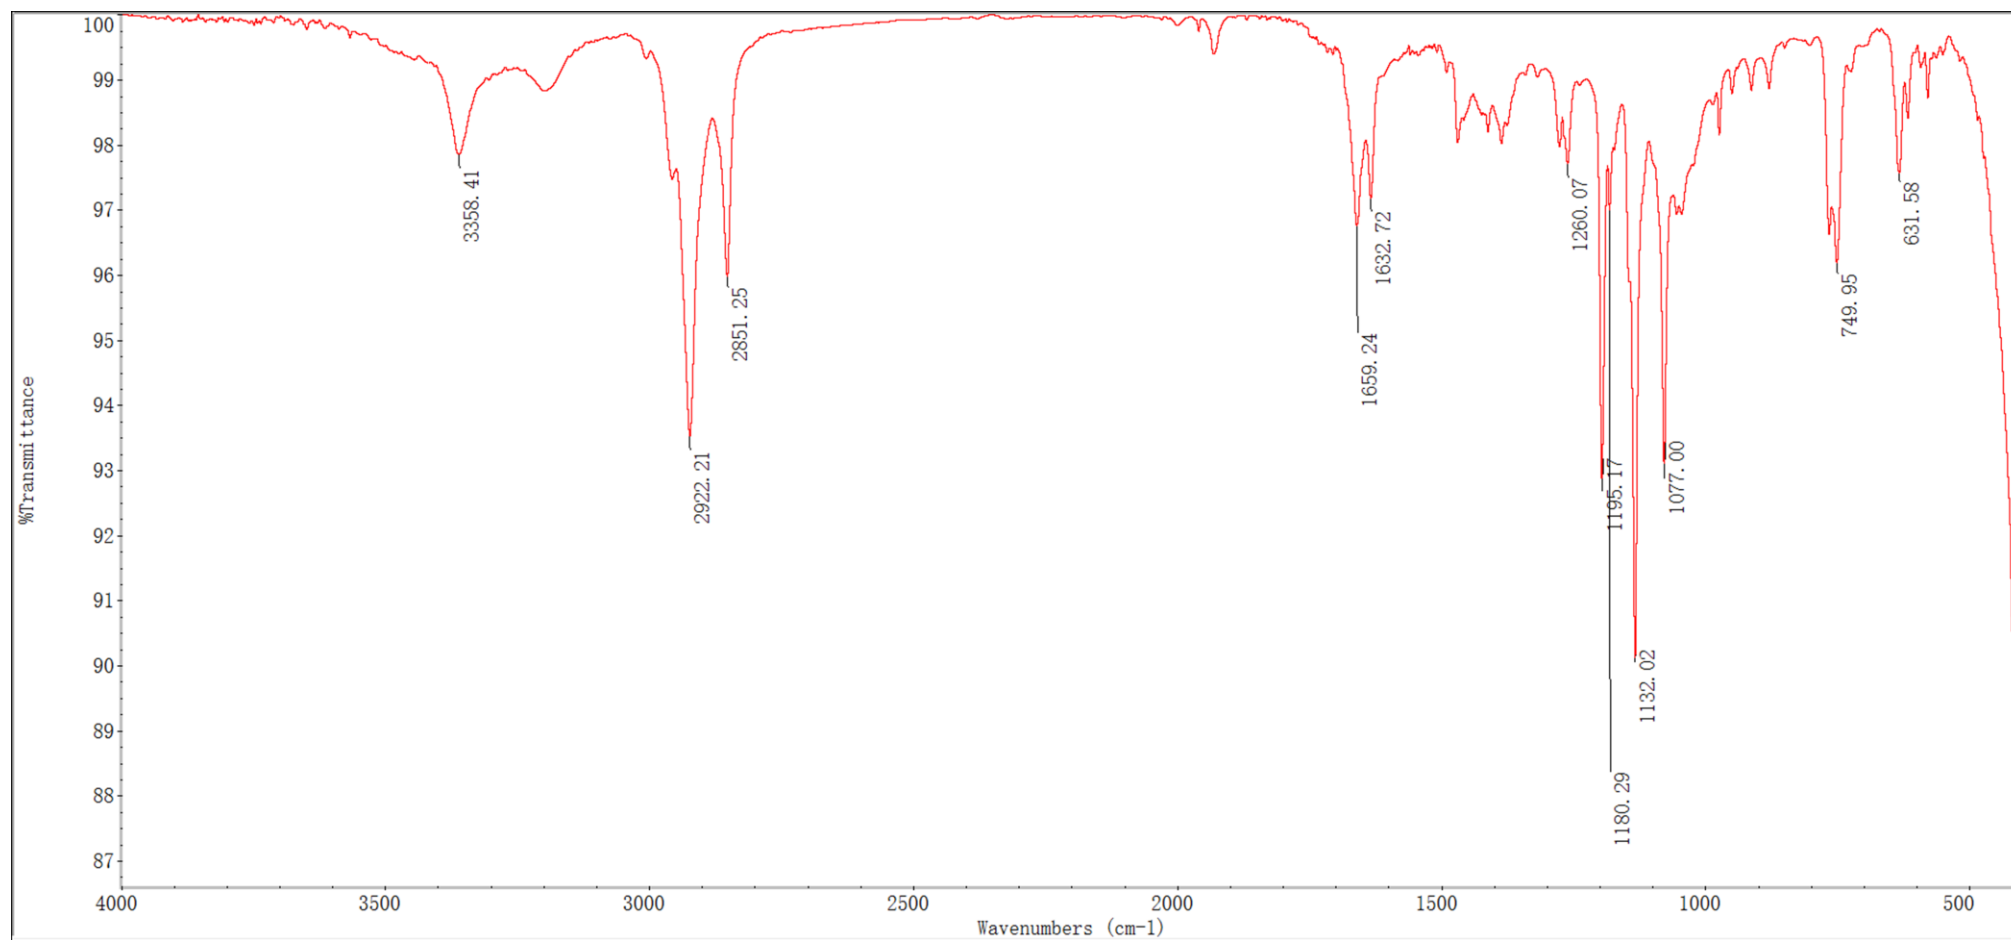

Figure S8: HR-ESIMS spectrum of 1.

## Elemental Composition Report

Page 1

### Multiple Mass Analysis: 3 mass(es) processed

Tolerance = 20.0 PPM / DBE: min = -1.5, max = 50.0

Isotope cluster parameters: Separation = 1.0 Abundance = 1.0%

Monoisotopic Mass, Odd and Even Electron Ions

19 formula(e) evaluated with 1 results within limits (up to 20 closest results for each mass)

SIMM-Mass Spec

Q-ToF Ultima

30-Sep-2015

D4h2

TOF MS ES-  
741

151297-1 25 (0.479) AM (Cen,4, 80.00, Ht,9000.0,384.93,0.70); Sm (SG, 2x1.00); Cm (25:46)

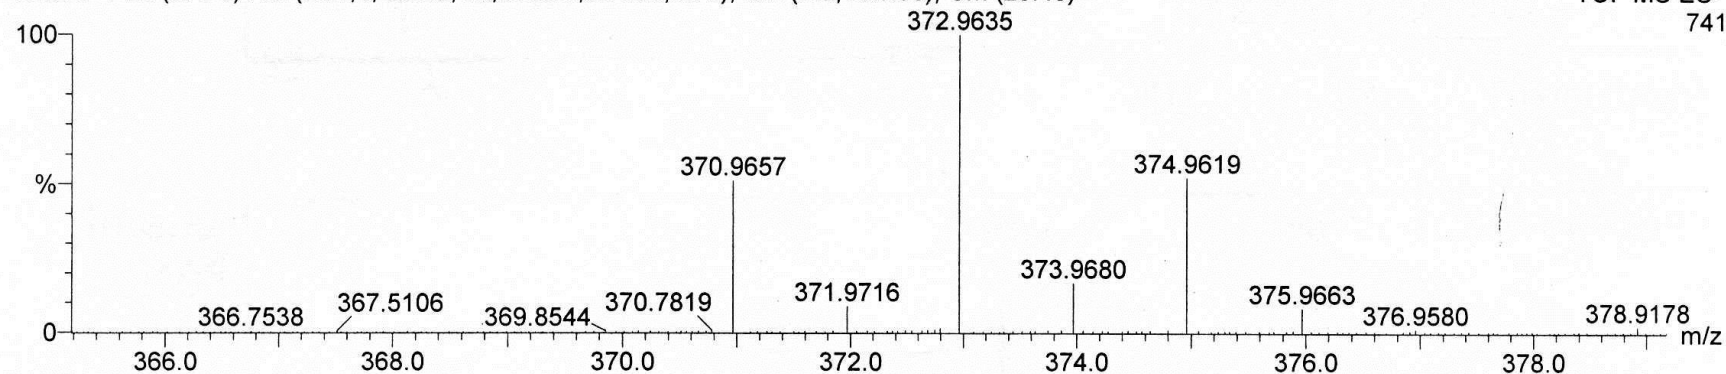

Minimum: 50.00  
Maximum: 100.00

| Mass     | RA     | Calc. Mass | mDa | PPM | DBE | Score | Formula       |
|----------|--------|------------|-----|-----|-----|-------|---------------|
| 370.9657 | 51.04  | 370.9646   | 1.1 | 2.9 | 6.5 | 1     | C15 H17 O Br2 |
| 372.9635 | 100.00 | ---        |     |     |     |       |               |
| 374.9619 | 52.28  | ---        |     |     |     |       |               |

**Figure S9:**  $^1\text{H}$  NMR spectrum (500 MHz,  $\text{CDCl}_3$ ) of **2**.

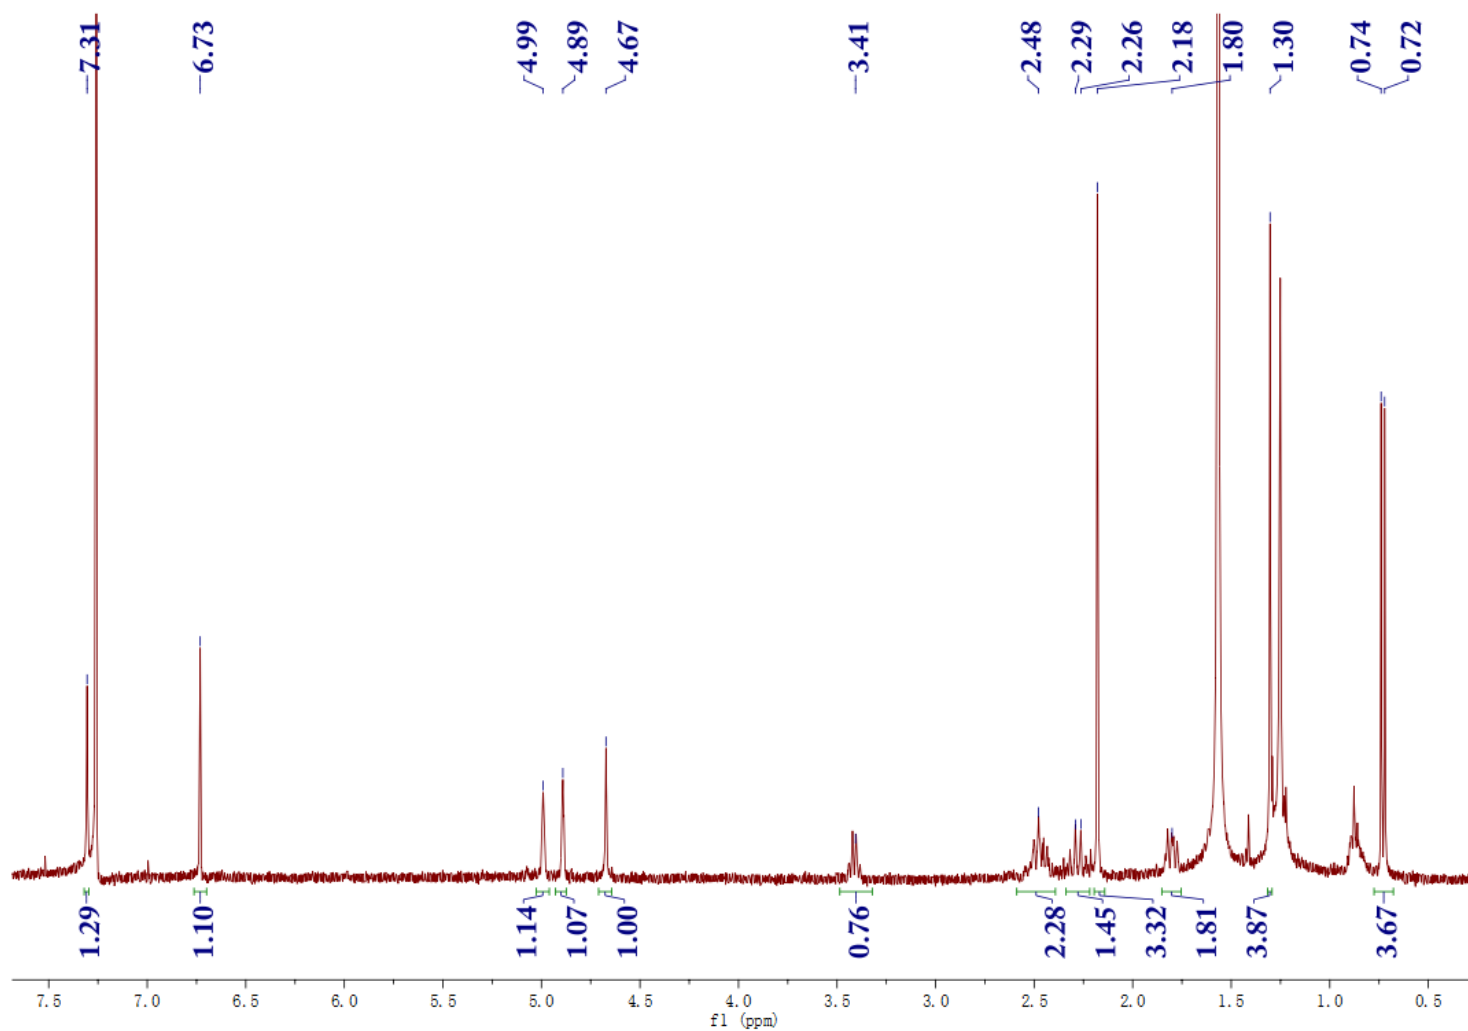

**Figure S10:**  $^{13}\text{C}$  NMR spectrum (125 MHz,  $\text{CDCl}_3$ ) of **2**.

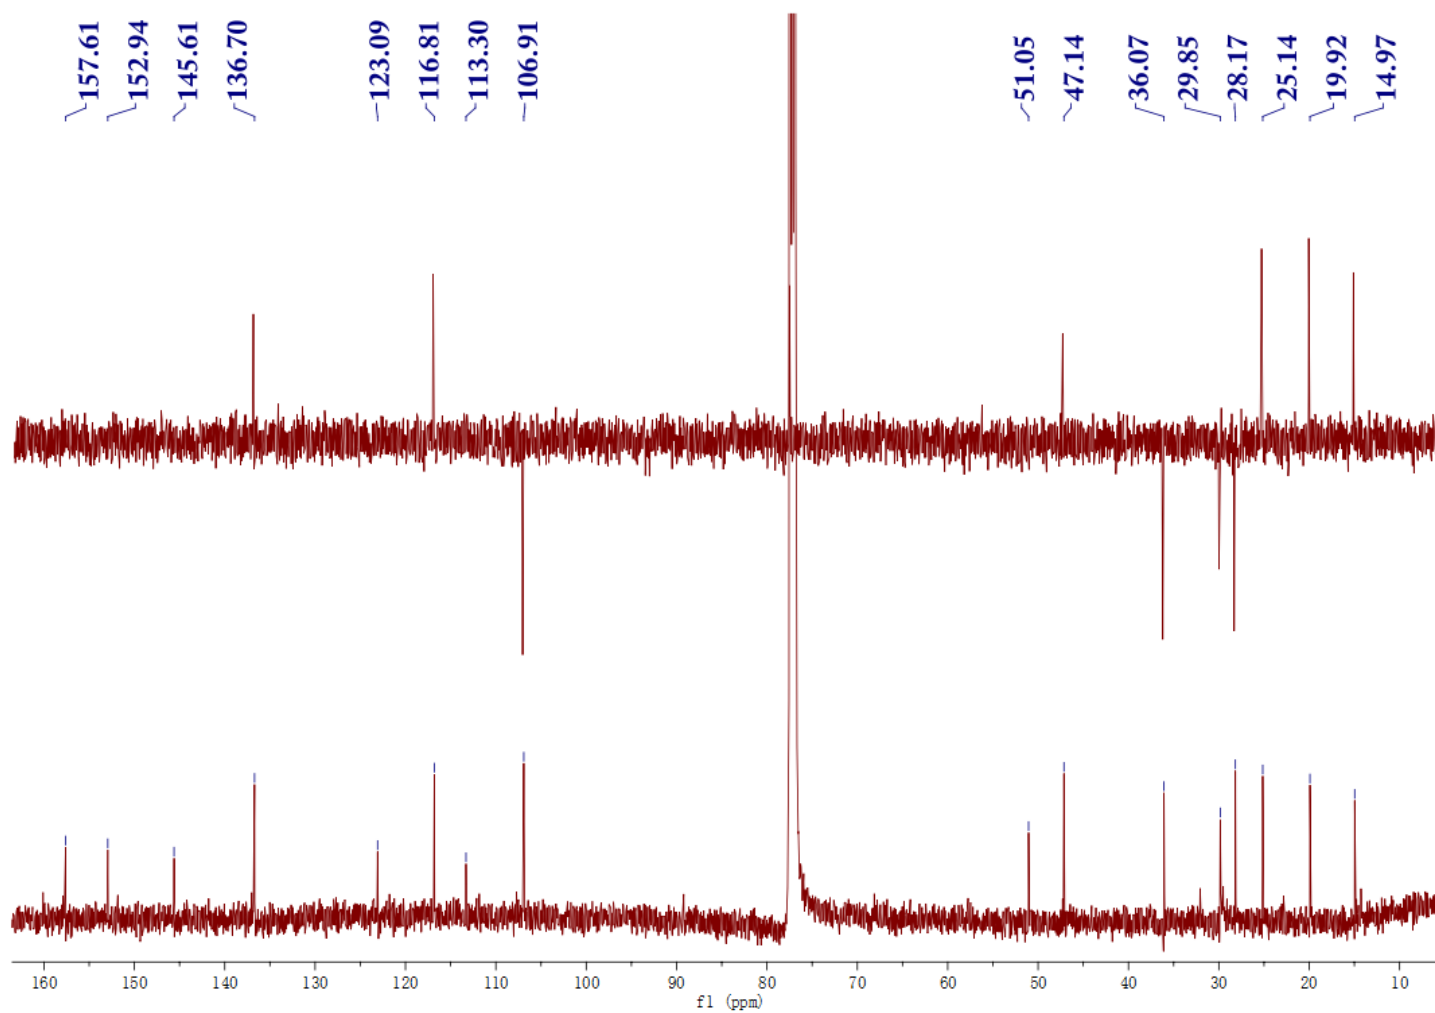

**Figure S11:**  $^1\text{H}, ^1\text{H}$  COSY spectrum (500 MHz,  $\text{CDCl}_3$ ) of **2**.

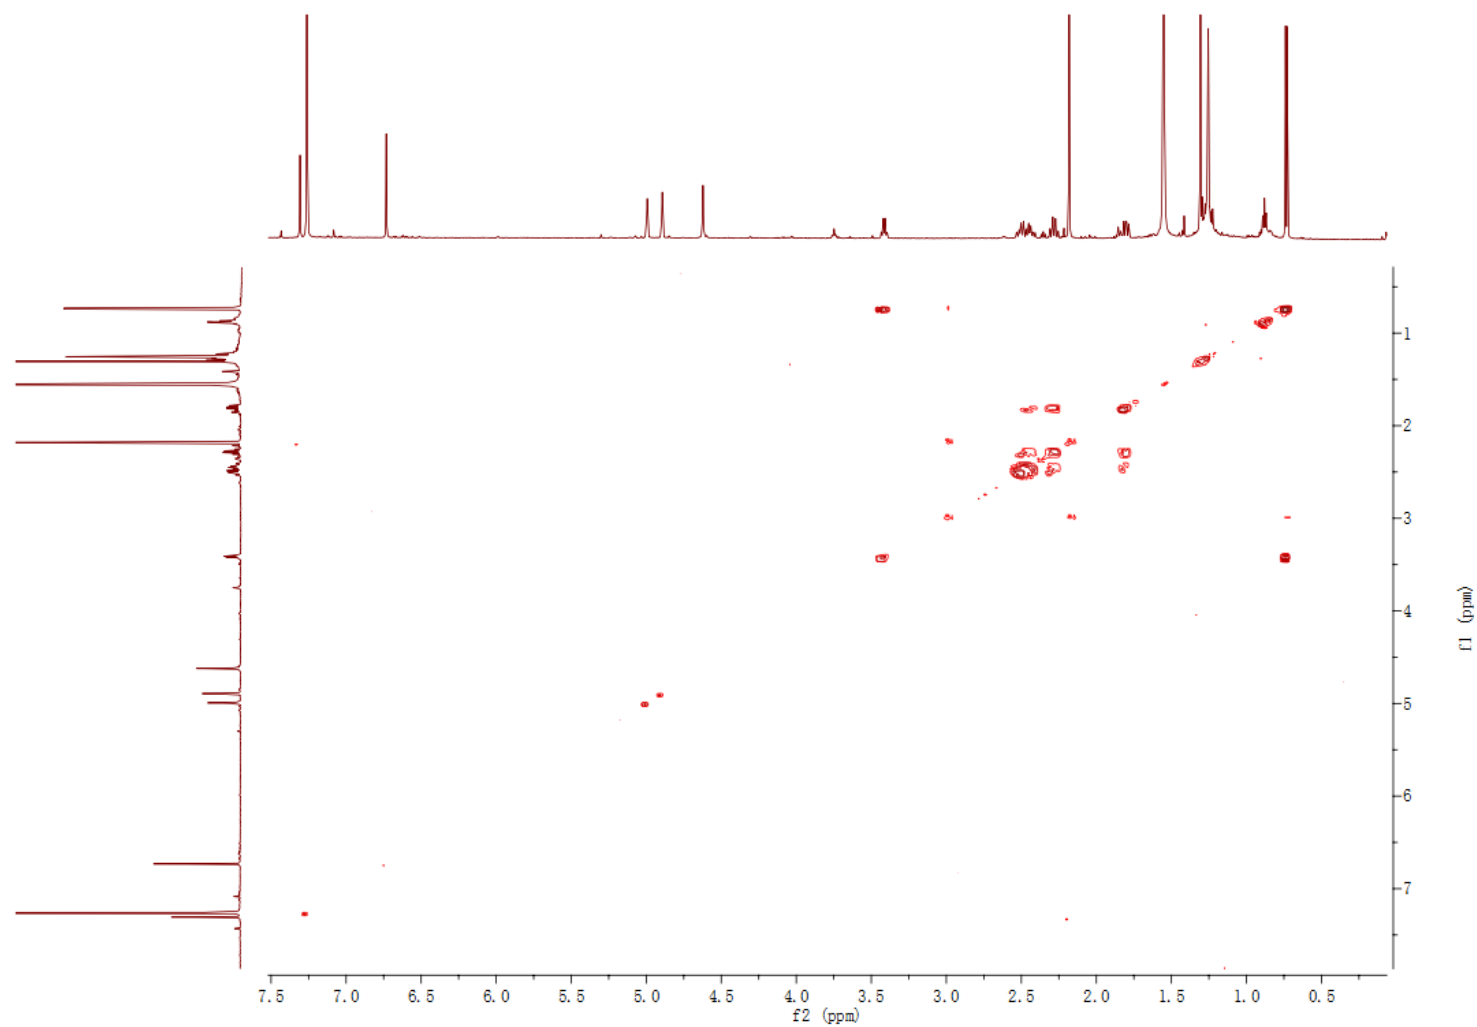

**Figure S12:** HMQC spectrum (500 MHz, CDCl<sub>3</sub>) of **2**.

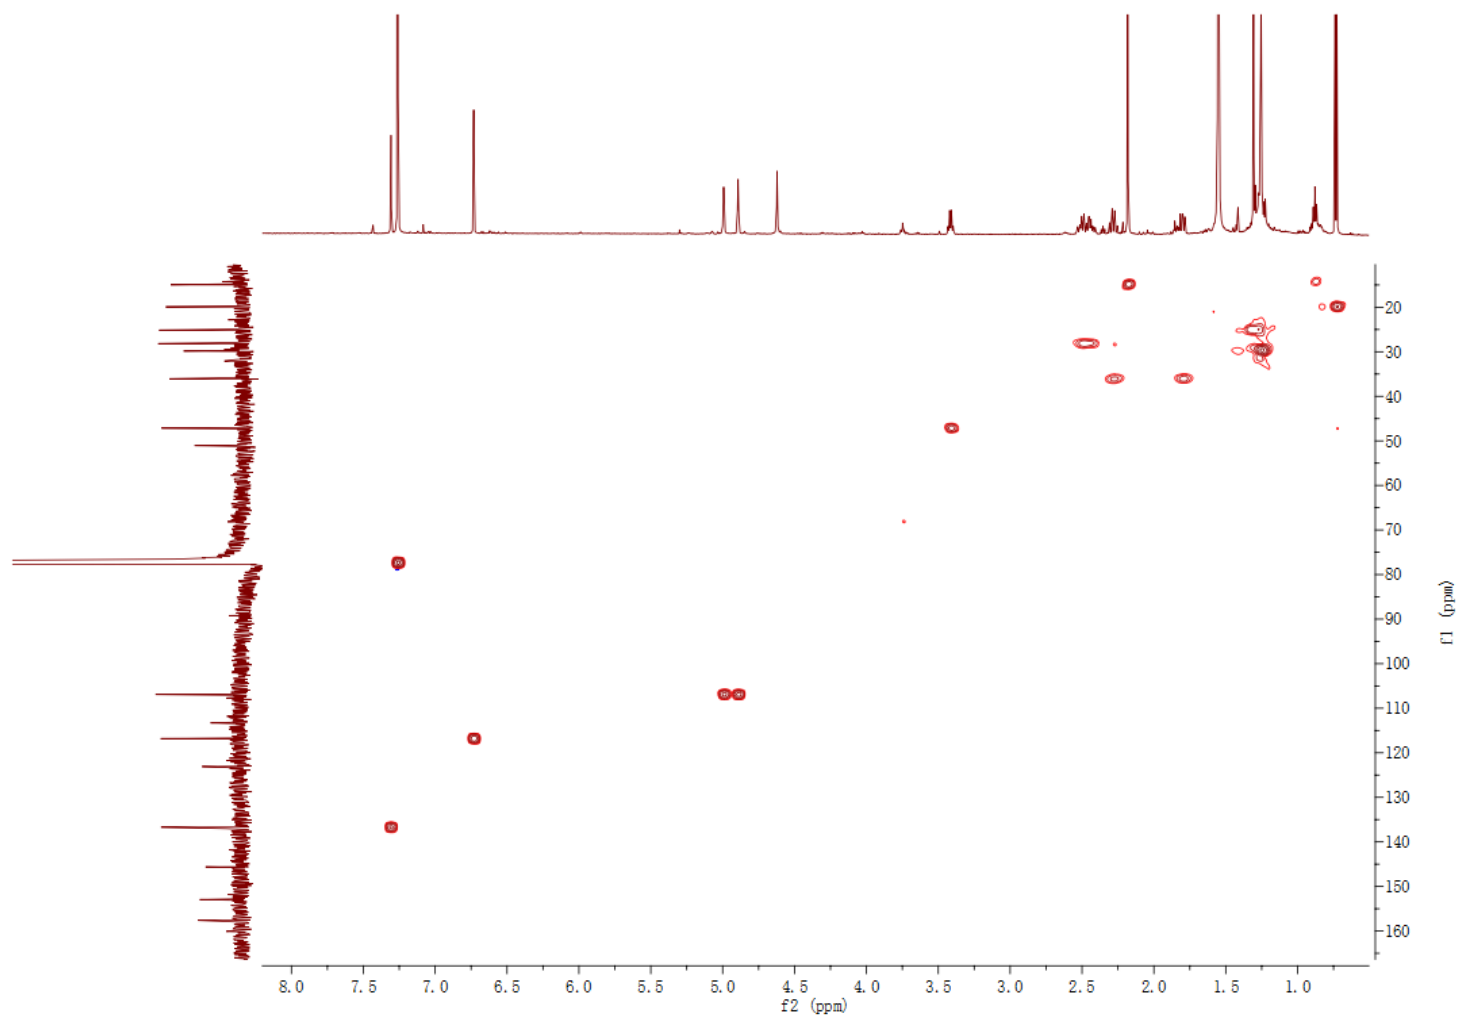

**Figure S13:** HMBC spectrum (500 MHz, CDCl<sub>3</sub>) of **2**.

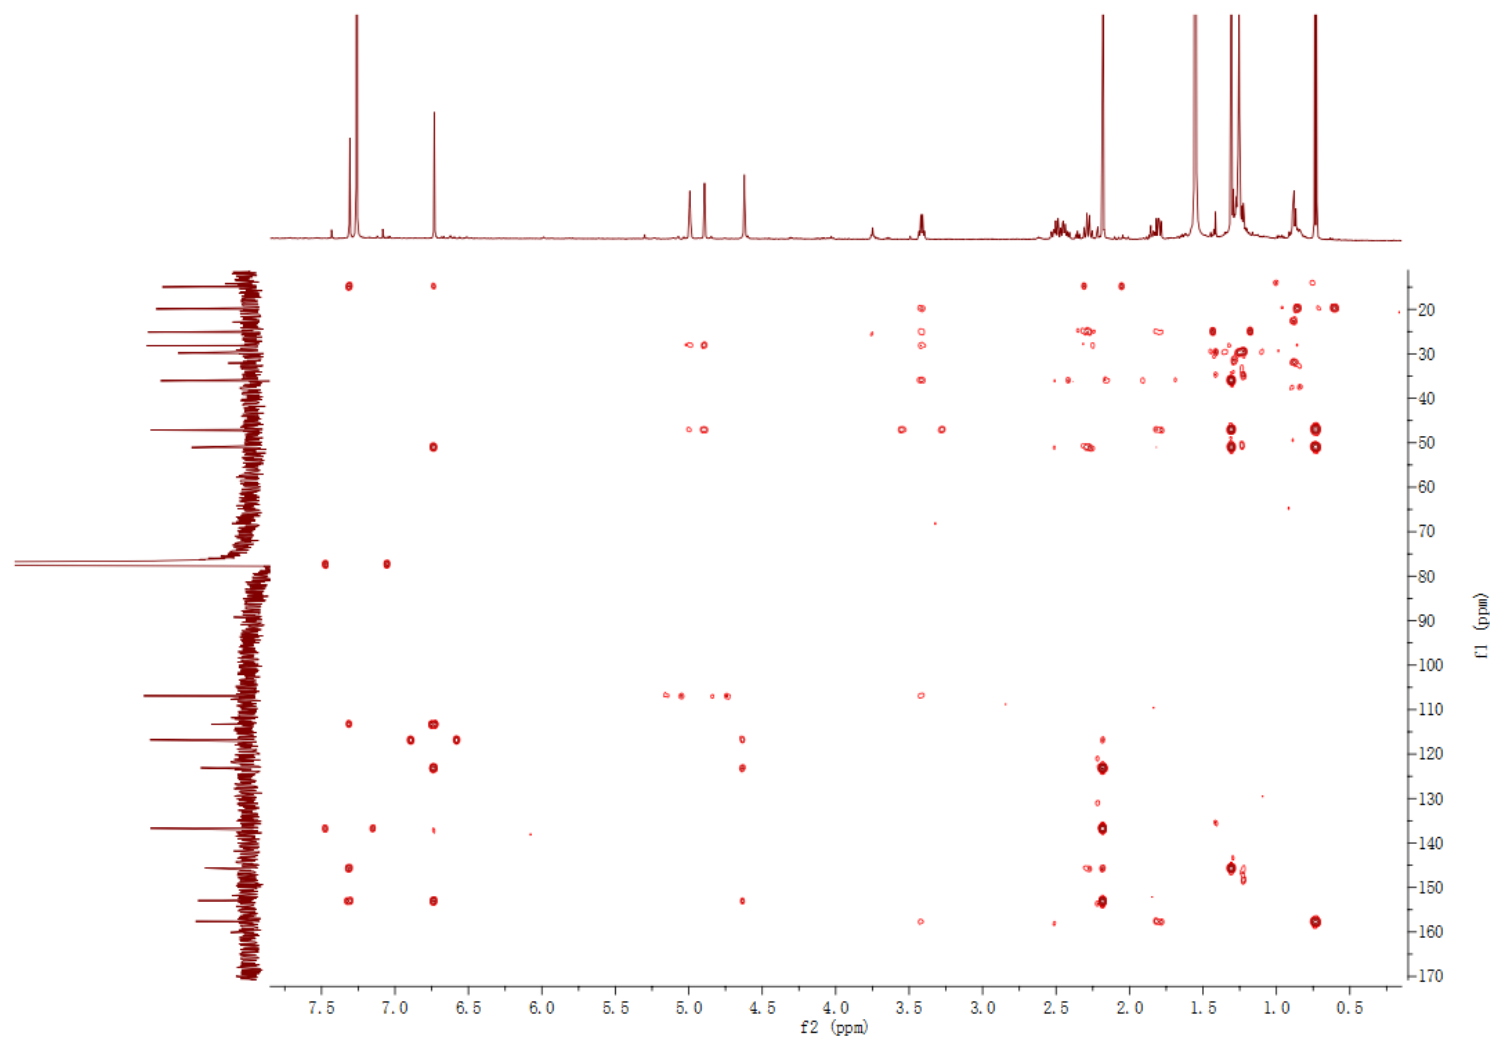



**Figure S14:** NOESY spectrum (500 MHz,  $\text{CDCl}_3$ ) of **2**.

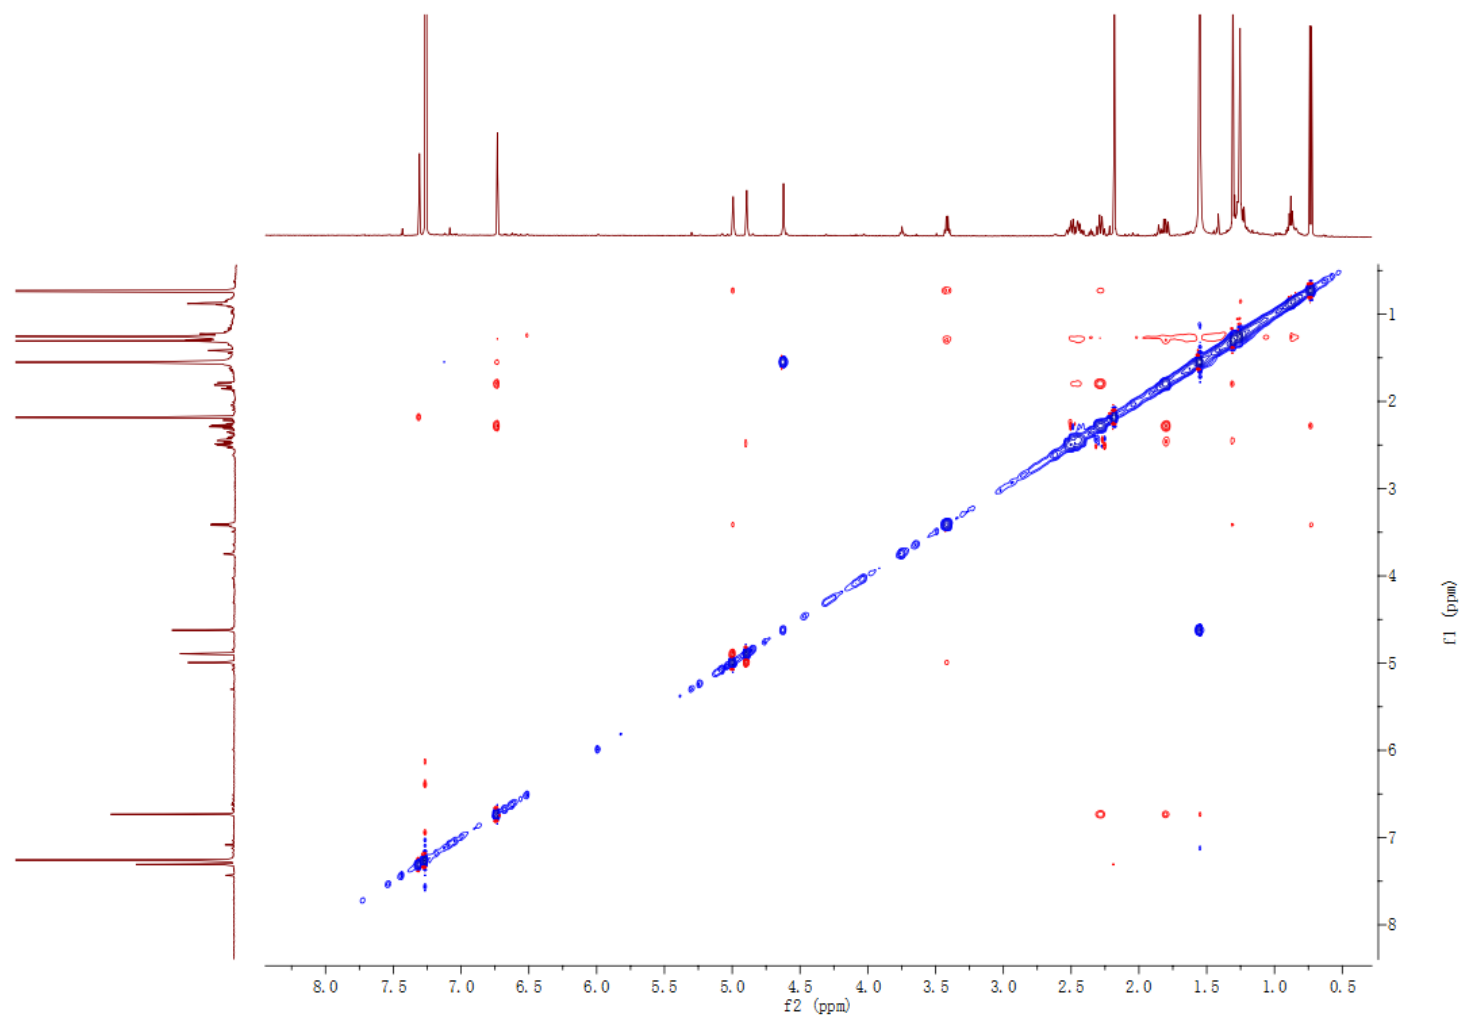

**Figure S15:** IR spectrum of **2**.

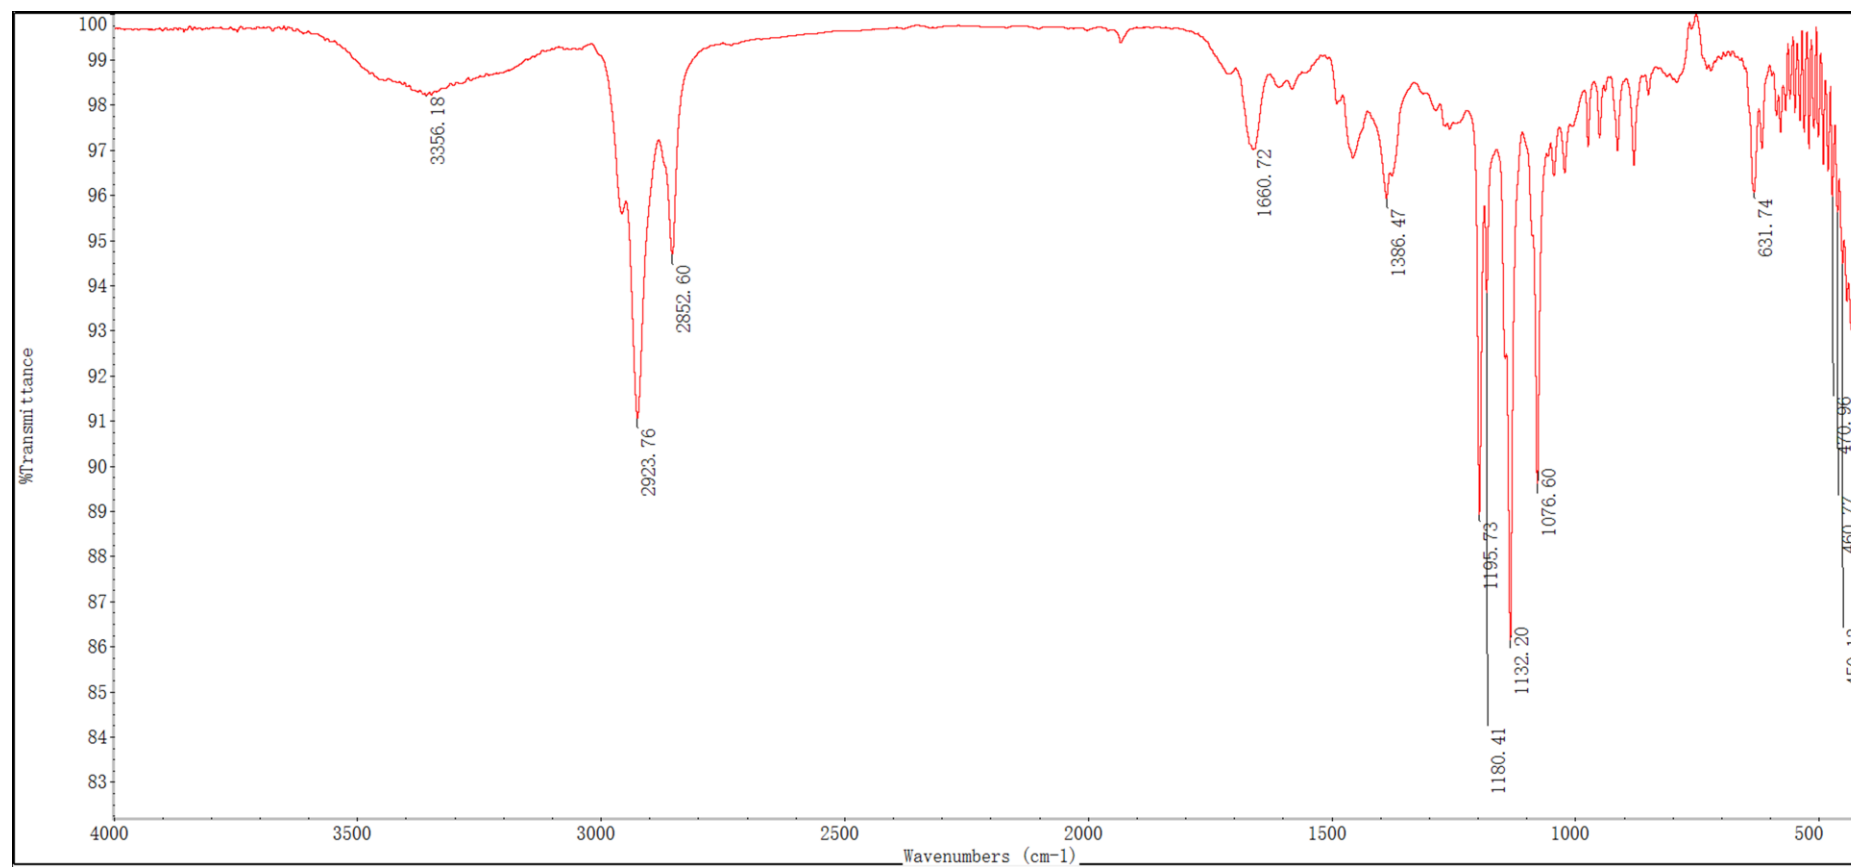

Figure S16: HR-ESIMS spectrum of 2.

# Elemental Composition Report

Page 1

## Multiple Mass Analysis: 2 mass(es) processed

Tolerance = 20.0 PPM / DBE: min = -1.5, max = 50.0

Isotope cluster parameters: Separation = 1.0 Abundance = 1.0%

Monoisotopic Mass, Odd and Even Electron Ions

9 formula(e) evaluated with 1 results within limits (up to 20 closest results for each mass)

SIMM-Mass Spec

Q-ToF Ultima

30-Sep-2015

D4g-2

151297-1 151 (2.855) AM (Cen,4, 80.00, Ht,9000.0,316.95,0.70); Sm (SG, 2x1.00); Cm (101:159)

TOF MS ES-  
1.49e3

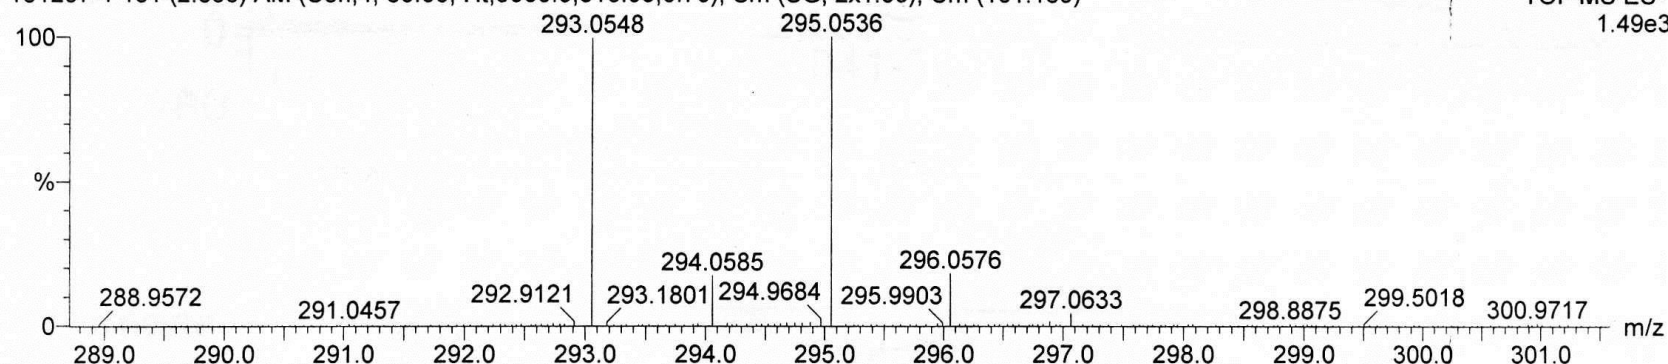

Minimum: 50.00  
Maximum: 100.00

| Mass     | RA     | Calc. Mass | mDa | PPM | DBE | Score | Formula      |
|----------|--------|------------|-----|-----|-----|-------|--------------|
| 293.0548 | 99.46  | 293.0541   | 0.7 | 2.4 | 6.5 | 1     | C15 H18 O Br |
| 295.0536 | 100.00 | ---        |     |     |     |       |              |

**Figure S17:**  $^1\text{H}$  NMR spectrum (500 MHz,  $\text{CDCl}_3$ ) of **3**.

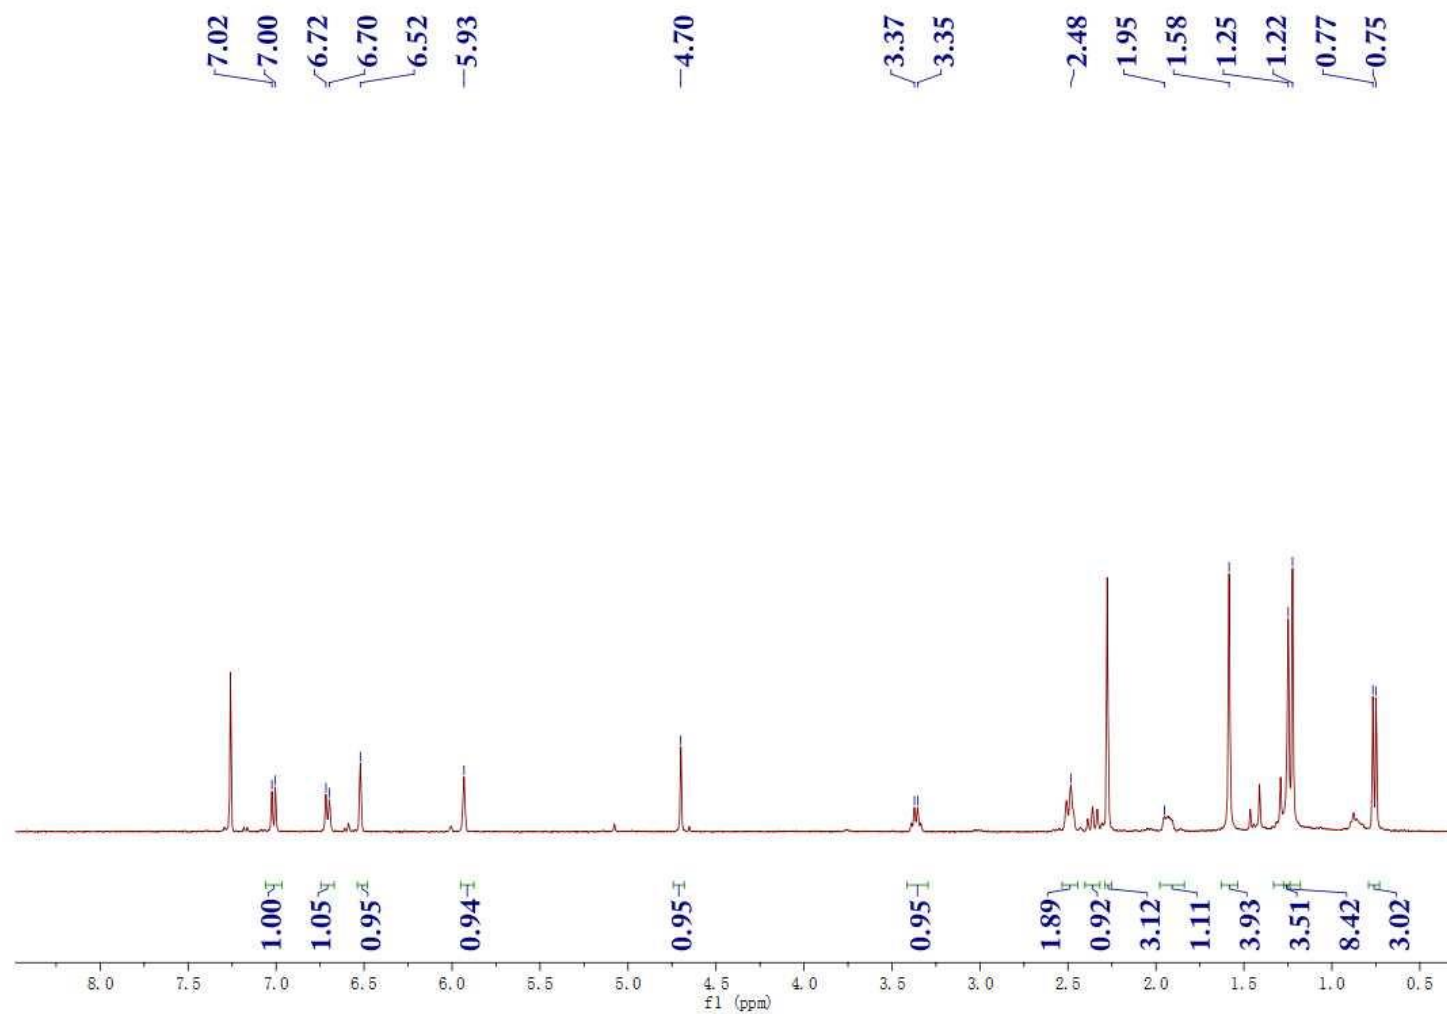

**Figure S18:**  $^{13}\text{C}$  NMR spectrum (125 MHz,  $\text{CDCl}_3$ ) of **3**.

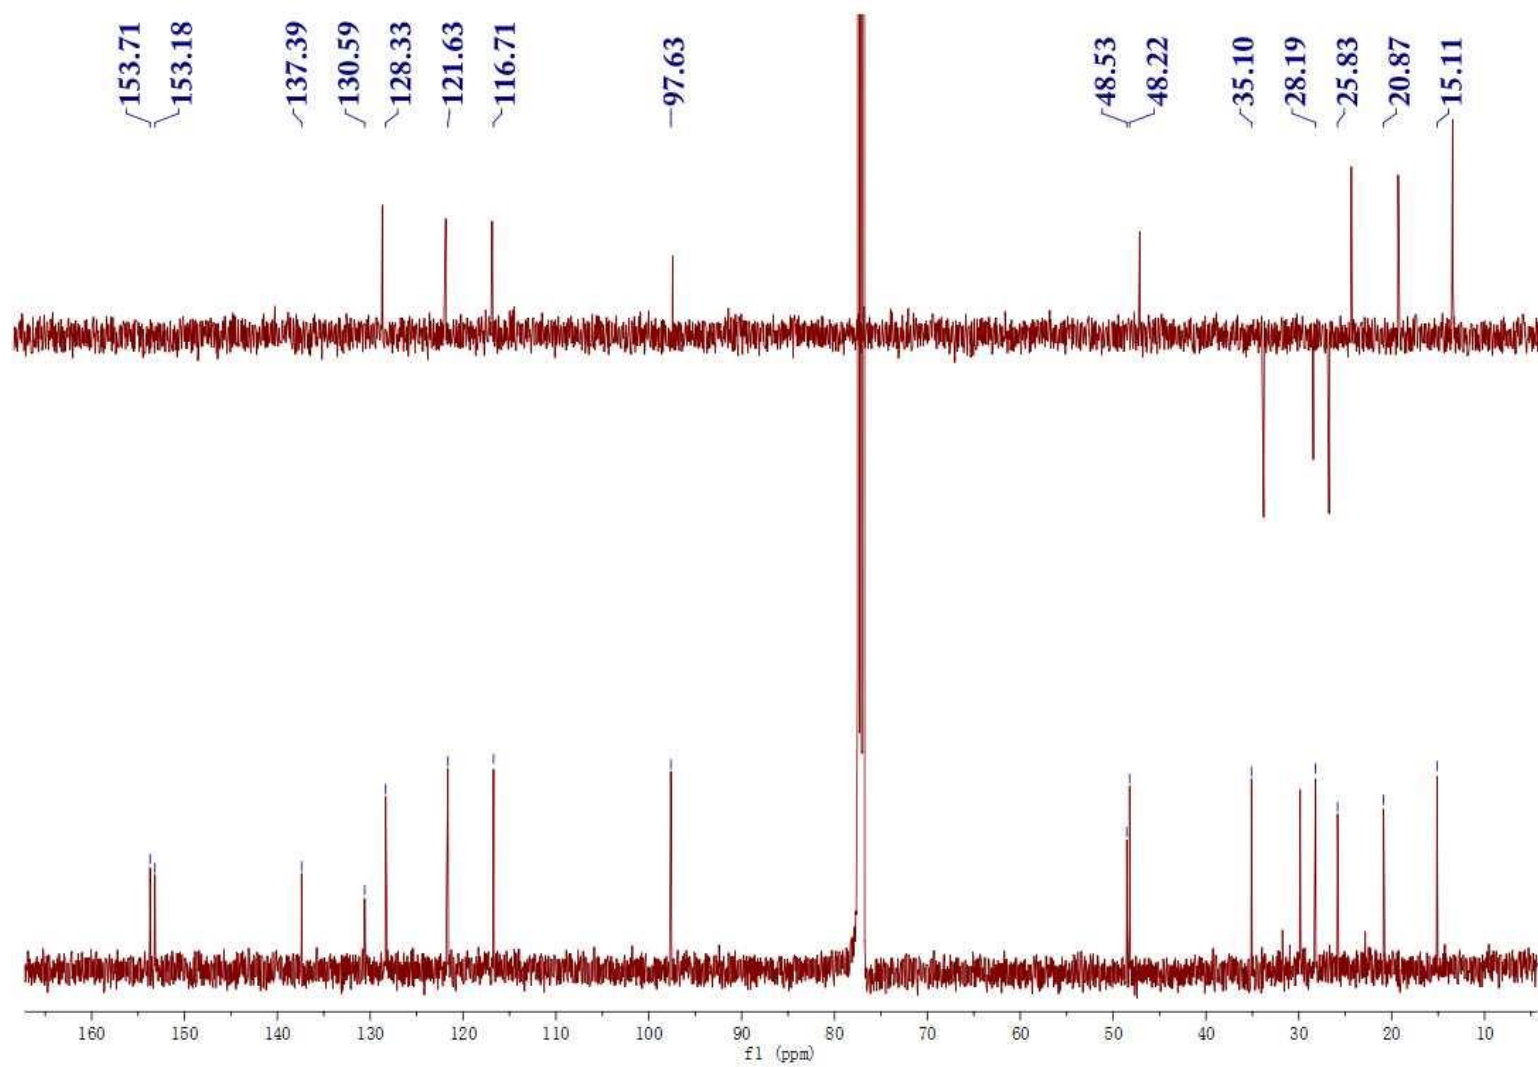

**Figure S19:**  $^1\text{H}, ^1\text{H}$  COSY spectrum (500 MHz,  $\text{CDCl}_3$ ) of **3**.

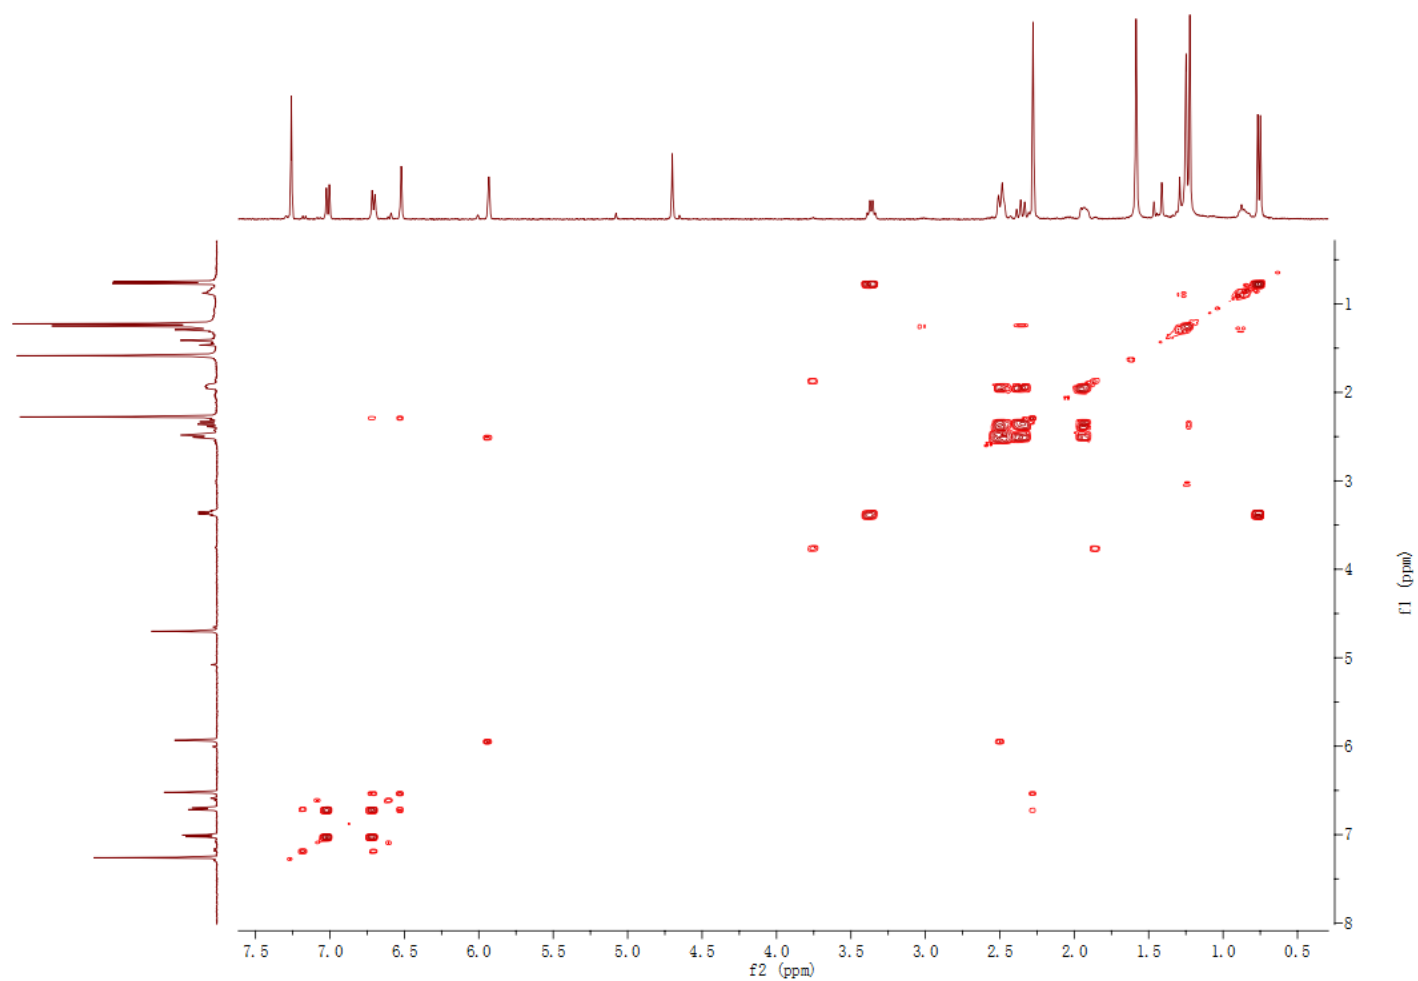

**Figure S20:** HMQC spectrum (500 MHz, CDCl<sub>3</sub>) of **3**.

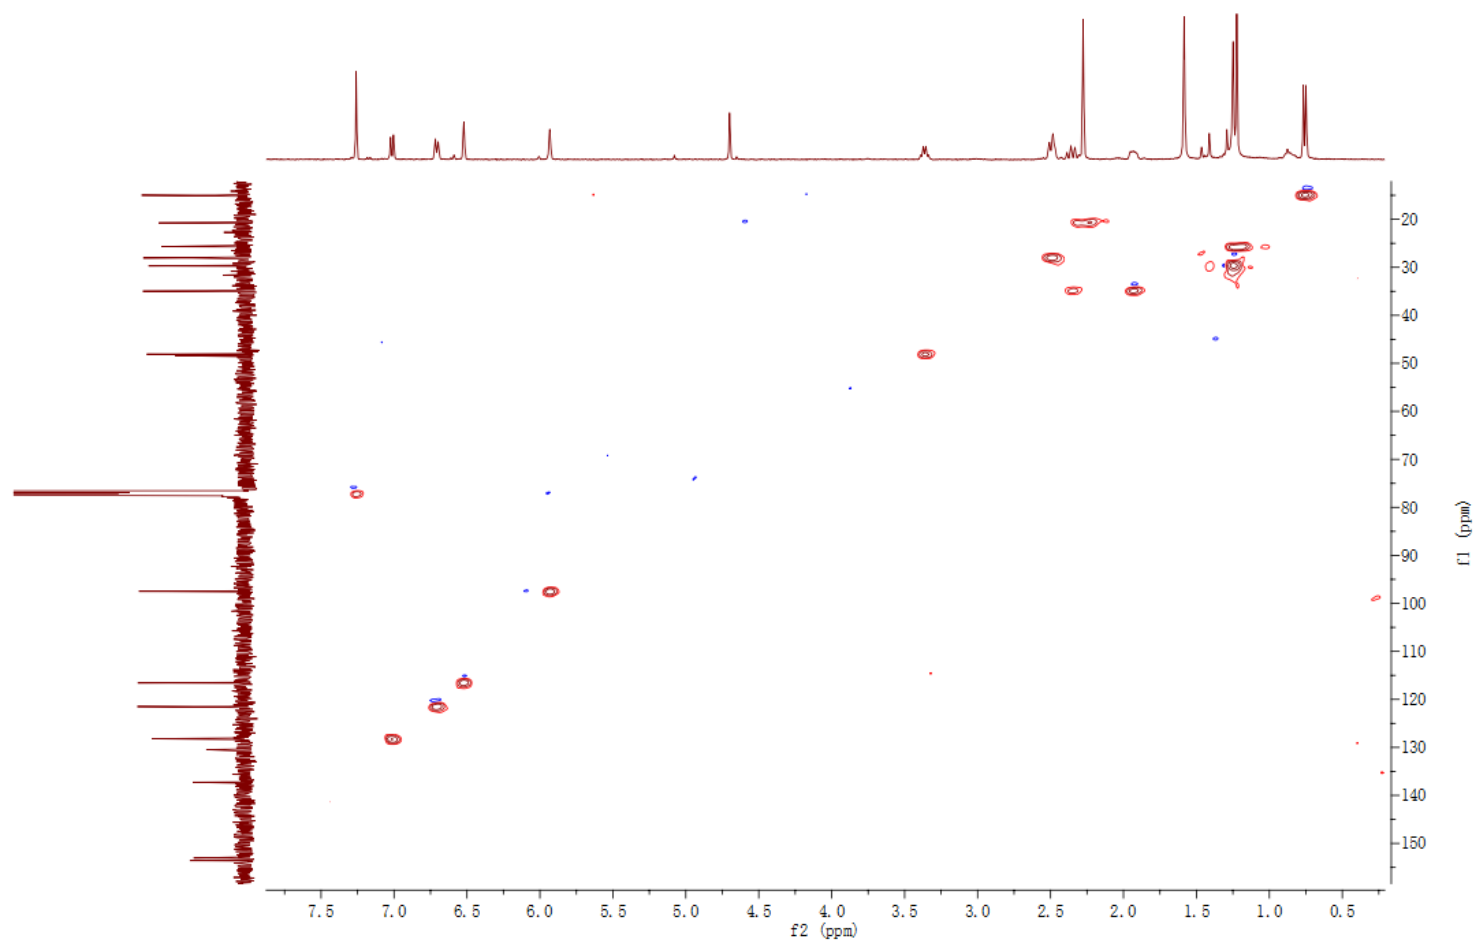

**Figure S21:** HMBC spectrum (500 MHz, CDCl<sub>3</sub>) of **3**.

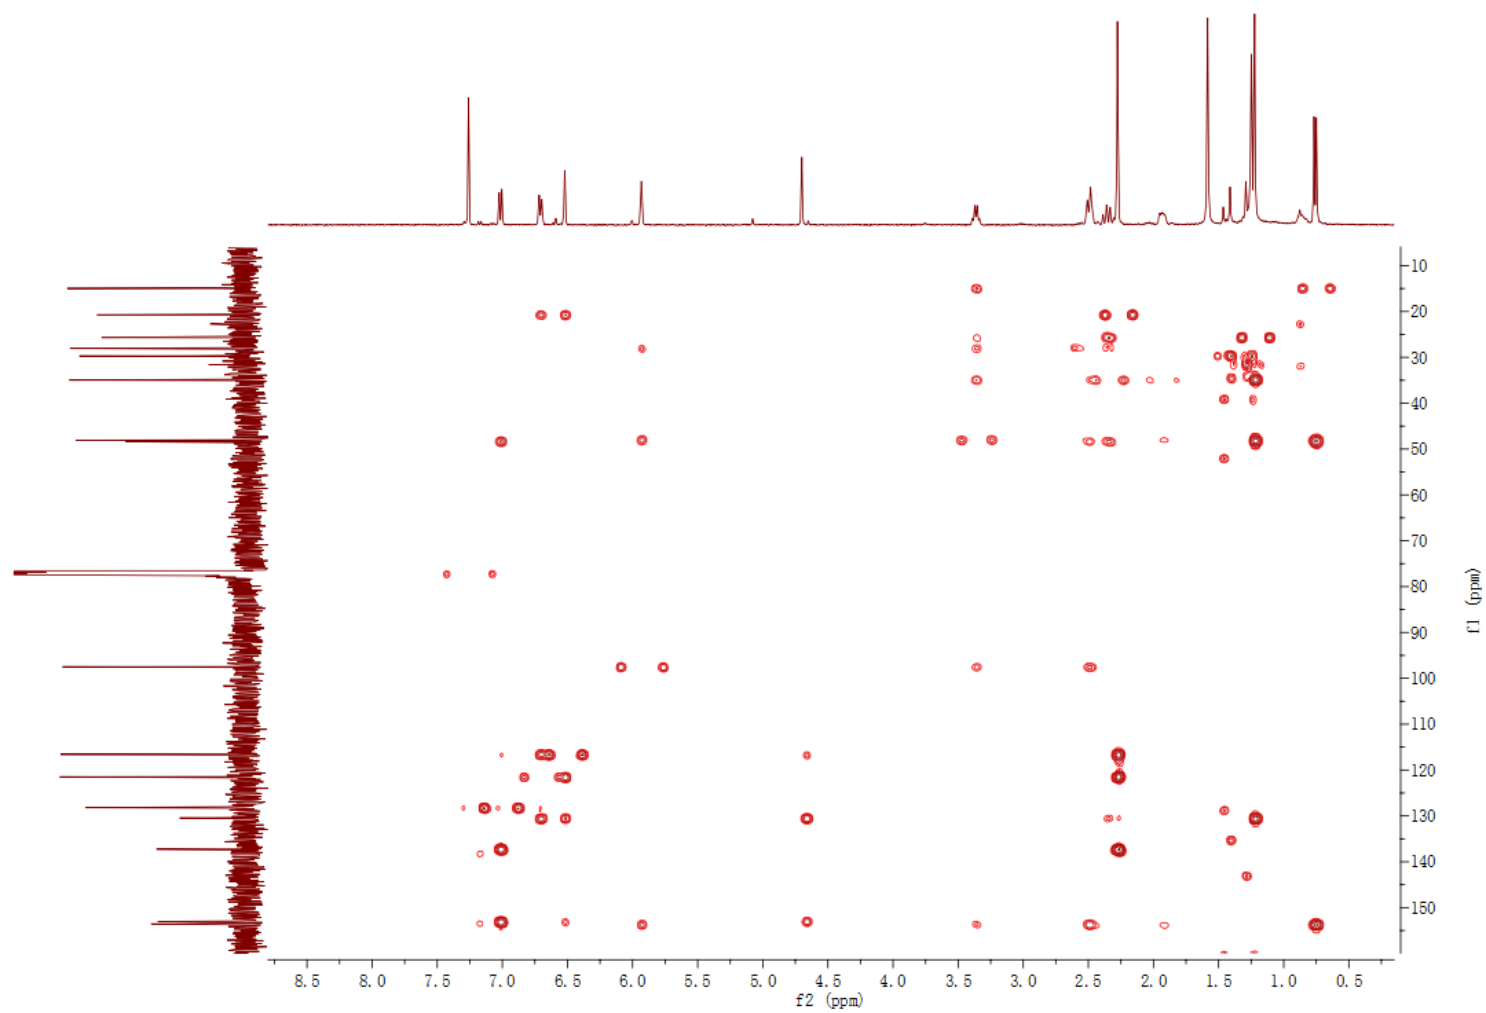



**Figure S22:** NOESY spectrum (500 MHz, CDCl<sub>3</sub>) of **3**.

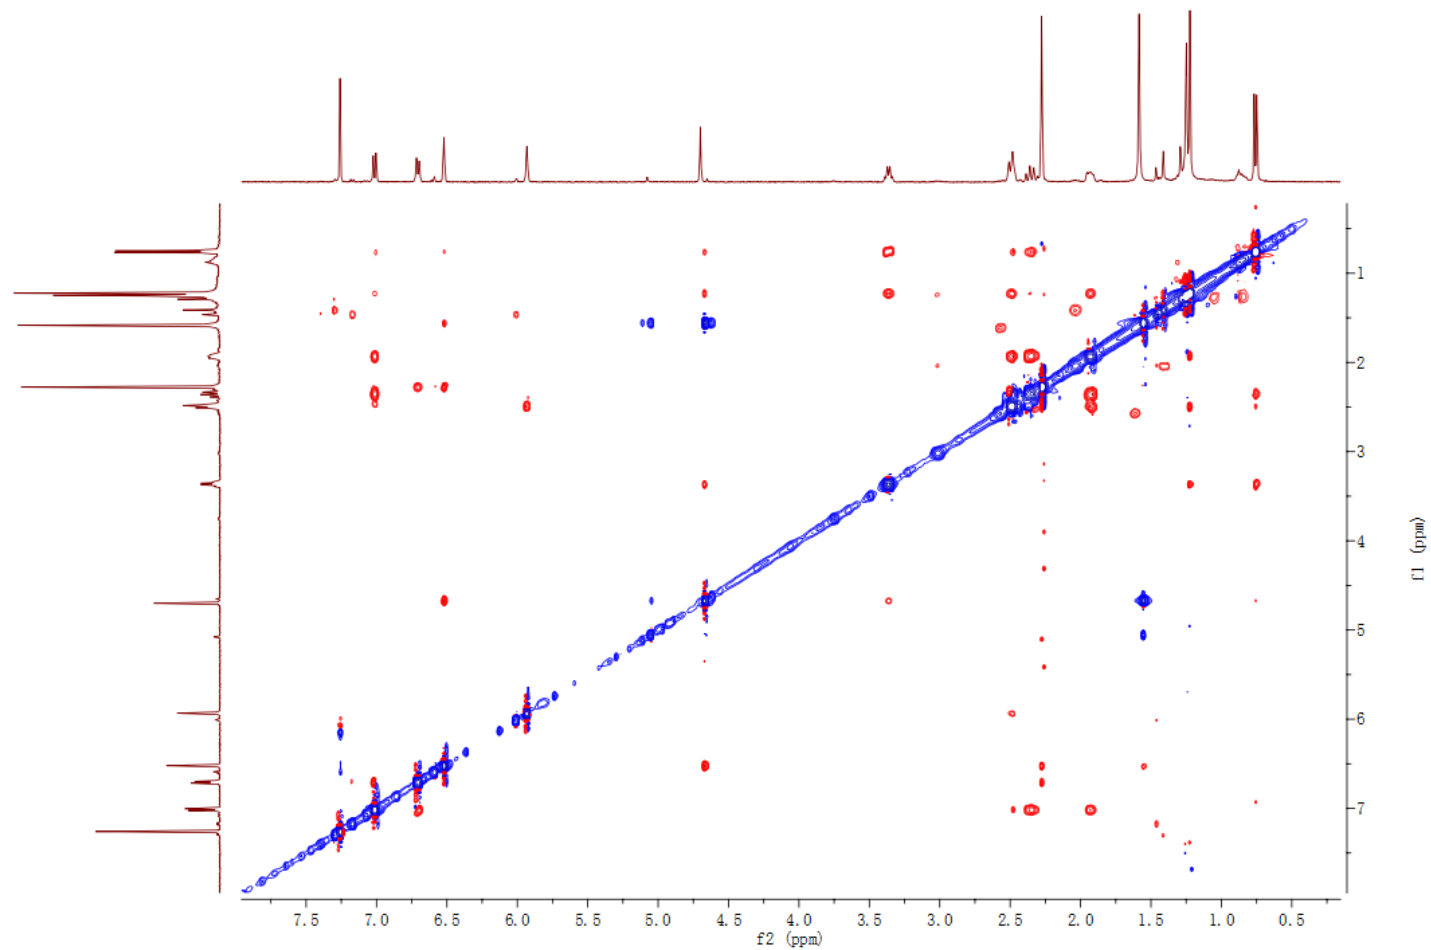

**Figure S23:** IR spectrum of **3**.

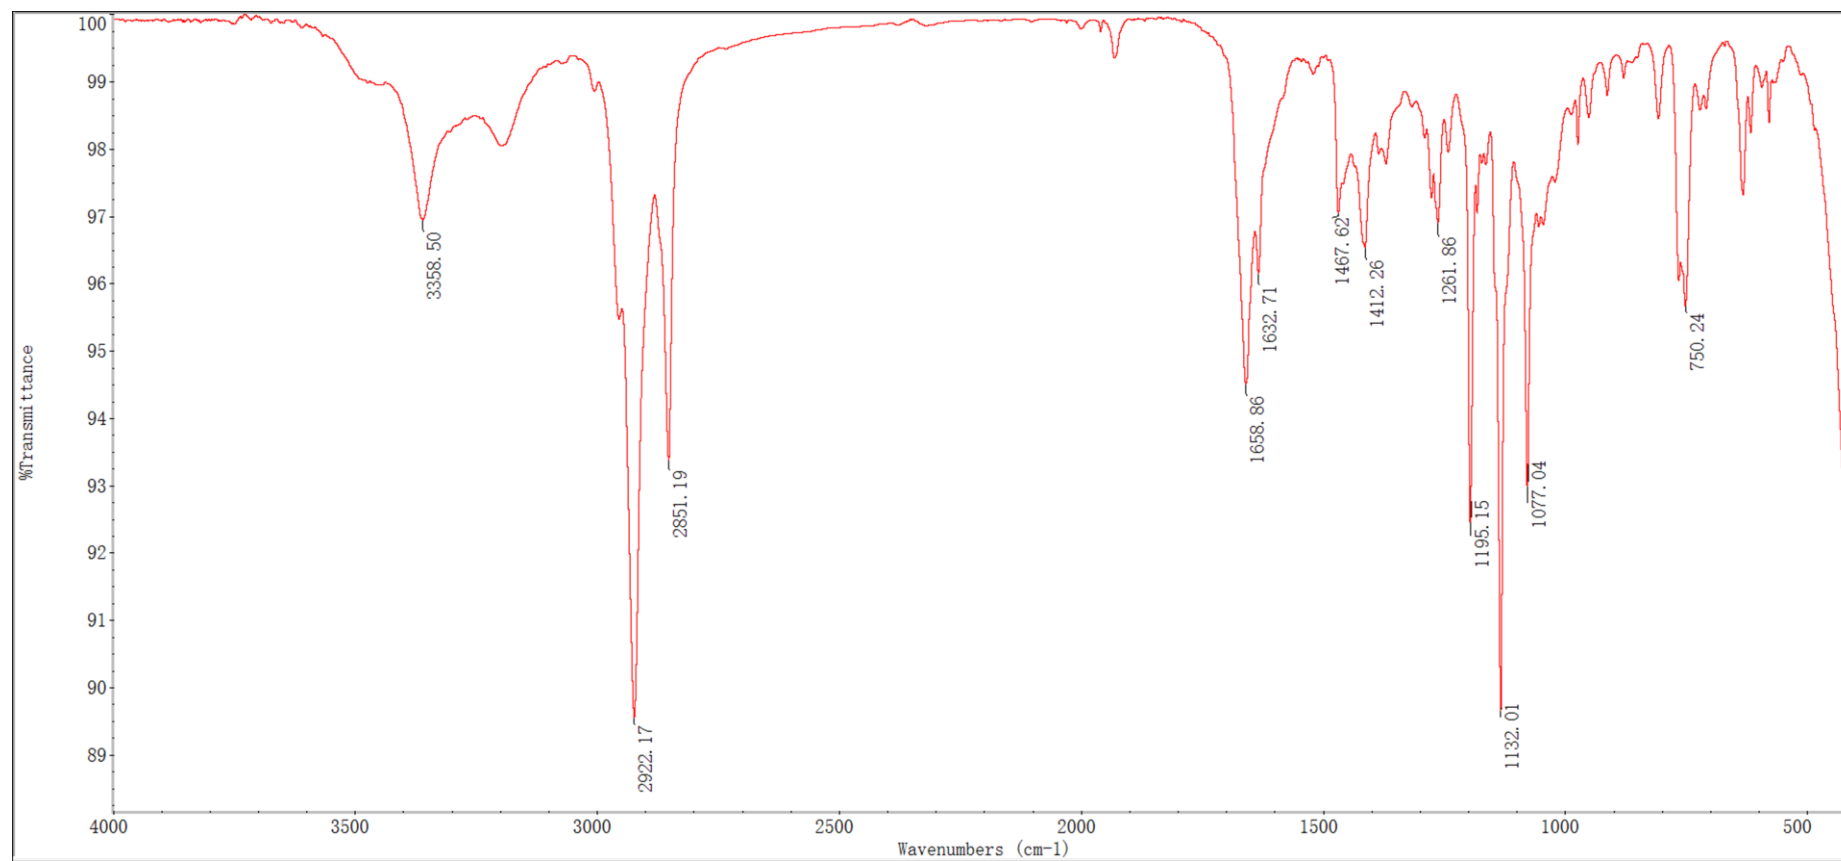

**Figure S24: HR-EIMS spectrum of 3.**

LIST: h150453-c2 26-Sep-15 Elapse: 01:38.4 15  
 Samp: c4a2 Start : 17:37:12 18  
 Comm: Finnigan/MAT95/70eV/R:10000  
 Mode: EI +VE +LMR BSCAN (EXP) UP HR NRM Study : S/N: PT200712-01-01  
 Oper: SIMM.CAS Client: S/N: PT001263 Inlet :  
 Limit: ( 0 )  
 : ( 404 ) C16.H100.Br.O2  
 Peak: 1000.00 mmu R+D: -2.0 > 60.0  
 Data: CMASS : converted

| Mass     | Intensity | %RA    | %RIC | Delta | R+D | Composition  |
|----------|-----------|--------|------|-------|-----|--------------|
| 55.06891 | * 5569    | 2.60   | 0.03 |       |     |              |
| 57.08490 | * 5806    | 2.71   | 0.03 |       |     |              |
| 67.06923 | * 5450    | 2.55   | 0.03 |       |     |              |
| 69.07027 | * 6043    | 2.83   | 0.03 | 0.2   | 1.5 | C5.H9        |
| 77.03876 | * 10190   | 4.76   | 0.05 | 0.4   | 4.5 | C6.H5        |
| 79.05401 | * 6161    | 2.88   | 0.03 | 0.8   | 3.5 | C6.H7        |
| 81.06935 | * 8650    | 4.04   | 0.04 | 1.1   | 2.5 | C6.H9        |
| 91.05108 | * 13626   | 6.37   | 0.07 |       |     |              |
| 92.99269 | * 93137   | 43.55  | 0.45 |       |     |              |
| 95.08308 | * 4739    | 2.22   | 0.02 | 3.0   | 2.5 | C7.H11       |
| 105.0727 | * 11731   | 5.48   | 0.06 | -2.3  | 4.5 | C8.H9        |
| 107.0905 | * 19670   | 9.20   | 0.10 |       |     |              |
| 111.9990 | * 28675   | 13.41  | 0.14 |       |     |              |
| 115.0565 | * 9361    | 4.38   | 0.05 | -1.7  | 6.5 | C9.H7        |
| 121.0658 | * 100484  | 46.98  | 0.49 | -0.4  | 4.5 | C8.H9.O      |
| 122.0693 | * 4384    | 2.05   | 0.02 |       |     |              |
| 128.0619 | * 5569    | 2.60   | 0.03 | 0.7   | 7.0 | C10.H8       |
| 135.0821 | * 24410   | 11.41  | 0.12 | -1.1  | 4.5 | C9.H11.O     |
| 145.0667 | * 15522   | 7.26   | 0.08 | -1.4  | 6.5 | C10.H9.O     |
| 146.9841 | * 4502    | 2.10   | 0.02 |       |     |              |
| 147.0798 | * 4384    | 2.05   | 0.02 | 1.2   | 5.5 | C10.H11.O    |
| 149.0249 | * 7583    | 3.55   | 0.04 |       |     |              |
| 158.0730 | * 4502    | 2.10   | 0.02 | 0.2   | 7.0 | C11.H10.O    |
| 159.0809 | * 38748   | 18.12  | 0.19 | 0.1   | 6.5 | C11.H11.O    |
| 160.0870 | * 9005    | 4.21   | 0.04 | 1.8   | 6.0 | C11.H12.O    |
| 171.0823 | * 4621    | 2.16   | 0.02 | -1.3  | 7.5 | C12.H11.O    |
| 173.0982 | * 20144   | 9.42   | 0.10 | -1.5  | 6.5 | C12.H13.O    |
| 185.0952 | * 15167   | 7.09   | 0.07 | 1.4   | 7.5 | C13.H13.O    |
| 186.1021 | * 6517    | 3.05   | 0.03 | 2.4   | 7.0 | C13.H14.O    |
| 187.1103 | * 8413    | 3.93   | 0.04 | 2.0   | 6.5 | C13.H15.O    |
| 191.1435 | * 8768    | 4.10   | 0.04 | 0.1   | 4.5 | C13.H19.O    |
| 199.1113 | * 17655   | 8.25   | 0.09 | 1.0   | 7.5 | C14.H15.O    |
| 200.1184 | * 14930   | 6.98   | 0.07 | 1.7   | 7.0 | C14.H16.O    |
| 207.0335 | * 14337   | 6.70   | 0.07 |       |     |              |
| 214.1352 | * 7228    | 3.38   | 0.04 | 0.5   | 7.0 | C15.H18.O    |
| 215.1415 | * 213884  | 100.00 | 1.04 | 2.1   | 6.5 | C15.H19.O    |
| 216.1460 | * 23225   | 10.86  | 0.11 |       |     |              |
| 279.0407 | * 8768    | 4.10   | 0.04 | -2.2  | 6.5 | C14.H16.Br.O |
| 281.0369 | * 11968   | 5.60   | 0.06 |       |     |              |
| 294.0617 | * 6754    | 3.16   | 0.03 | 0.2   | 6.0 | C15.H19.Br.O |
| 296.0594 | * 7109    | 3.32   | 0.03 |       |     |              |

**Figure S25:**  $^1\text{H}$  NMR spectrum (500 MHz,  $\text{CDCl}_3$ ) of **4**.

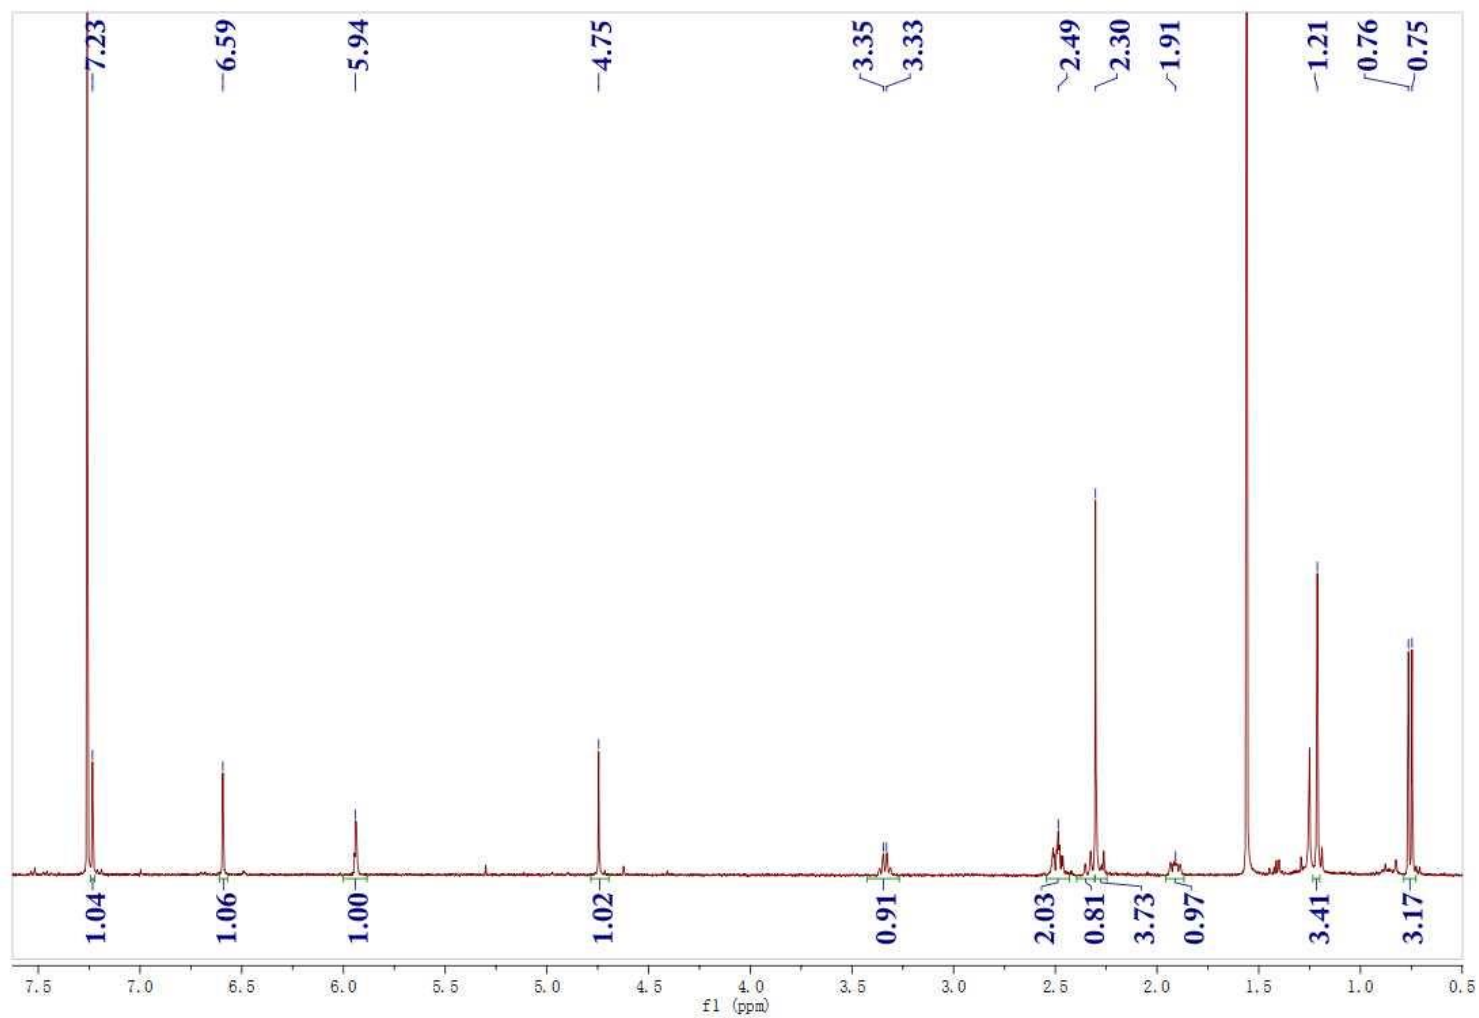

**Figure S26:**  $^{13}\text{C}$  NMR spectrum (125 MHz,  $\text{CDCl}_3$ ) of **4**.

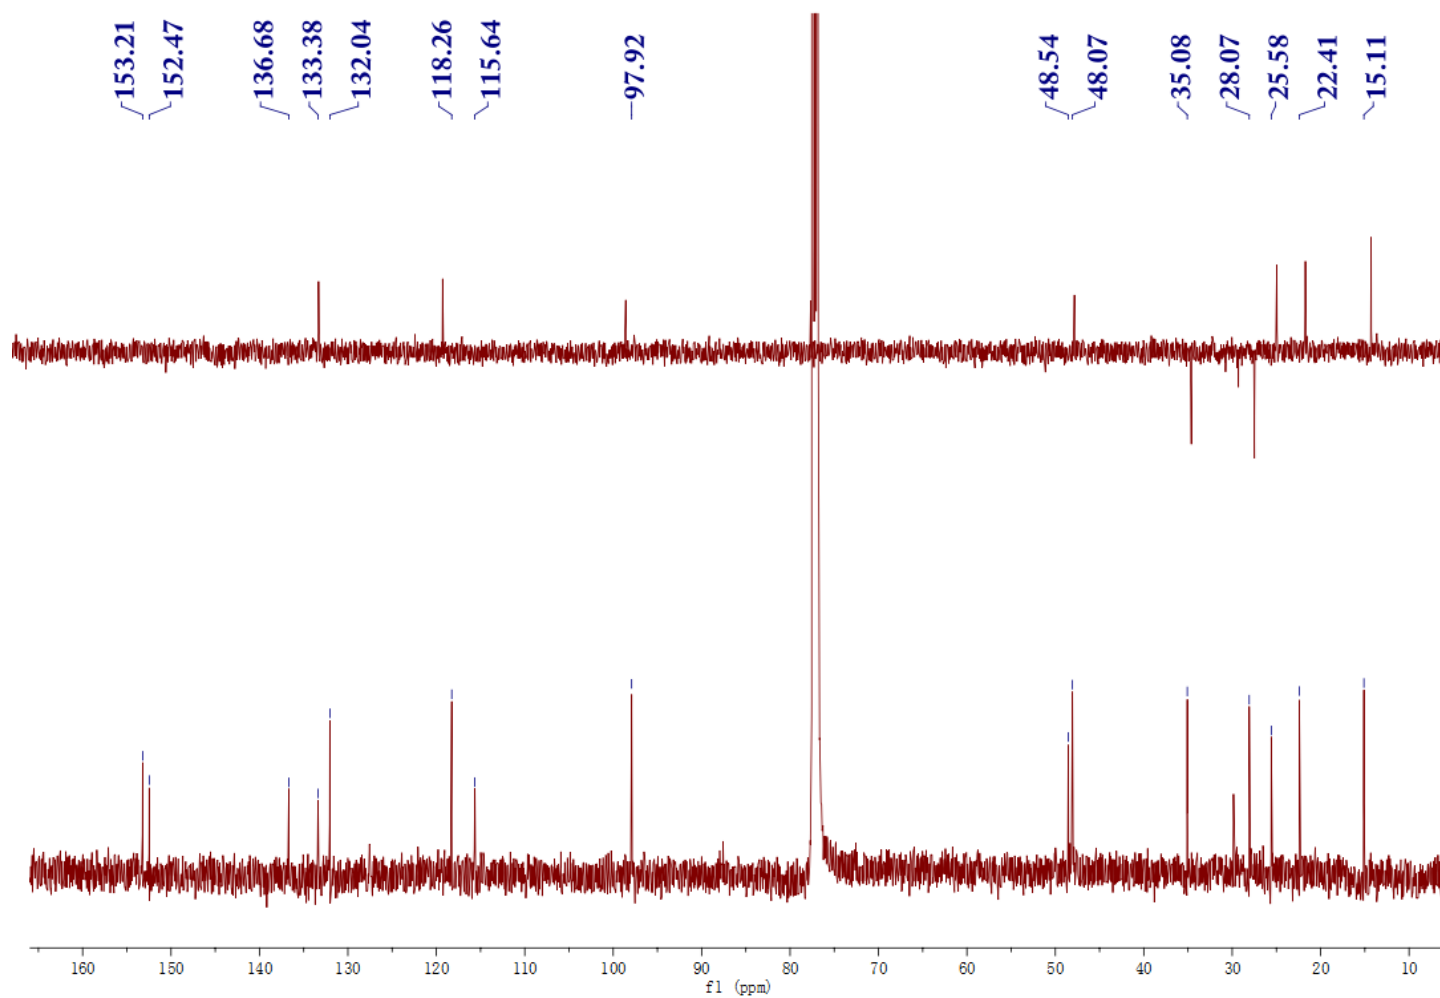

**Figure S27:**  $^1\text{H}, ^1\text{H}$  COSY spectrum (500 MHz,  $\text{CDCl}_3$ ) of **4**.

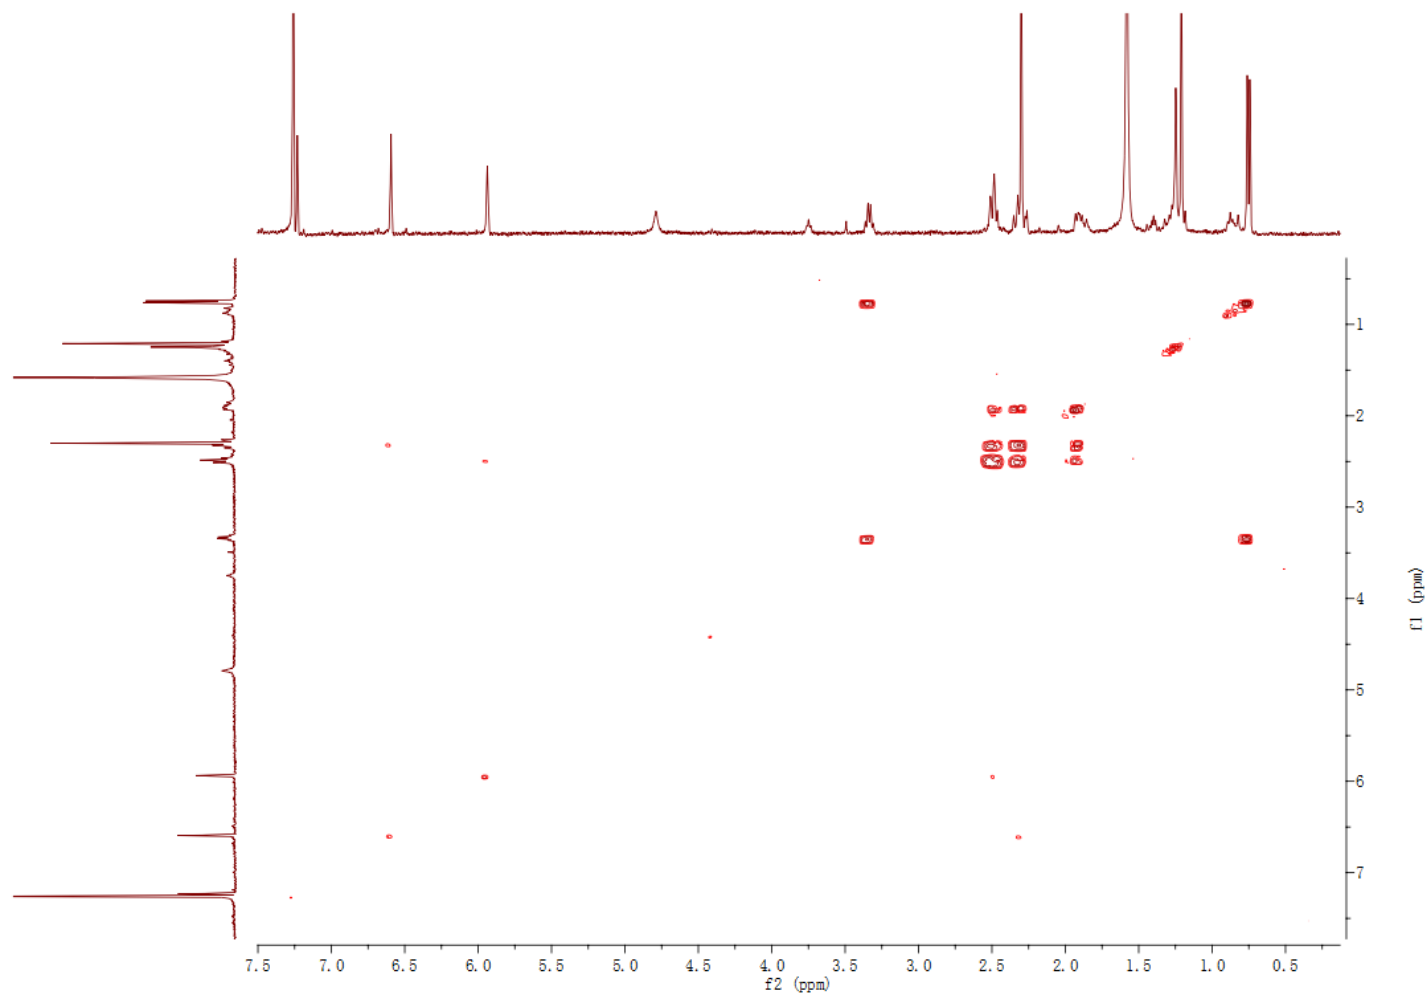

**Figure S28:** HMQC spectrum (500 MHz, CDCl<sub>3</sub>) of **4**.

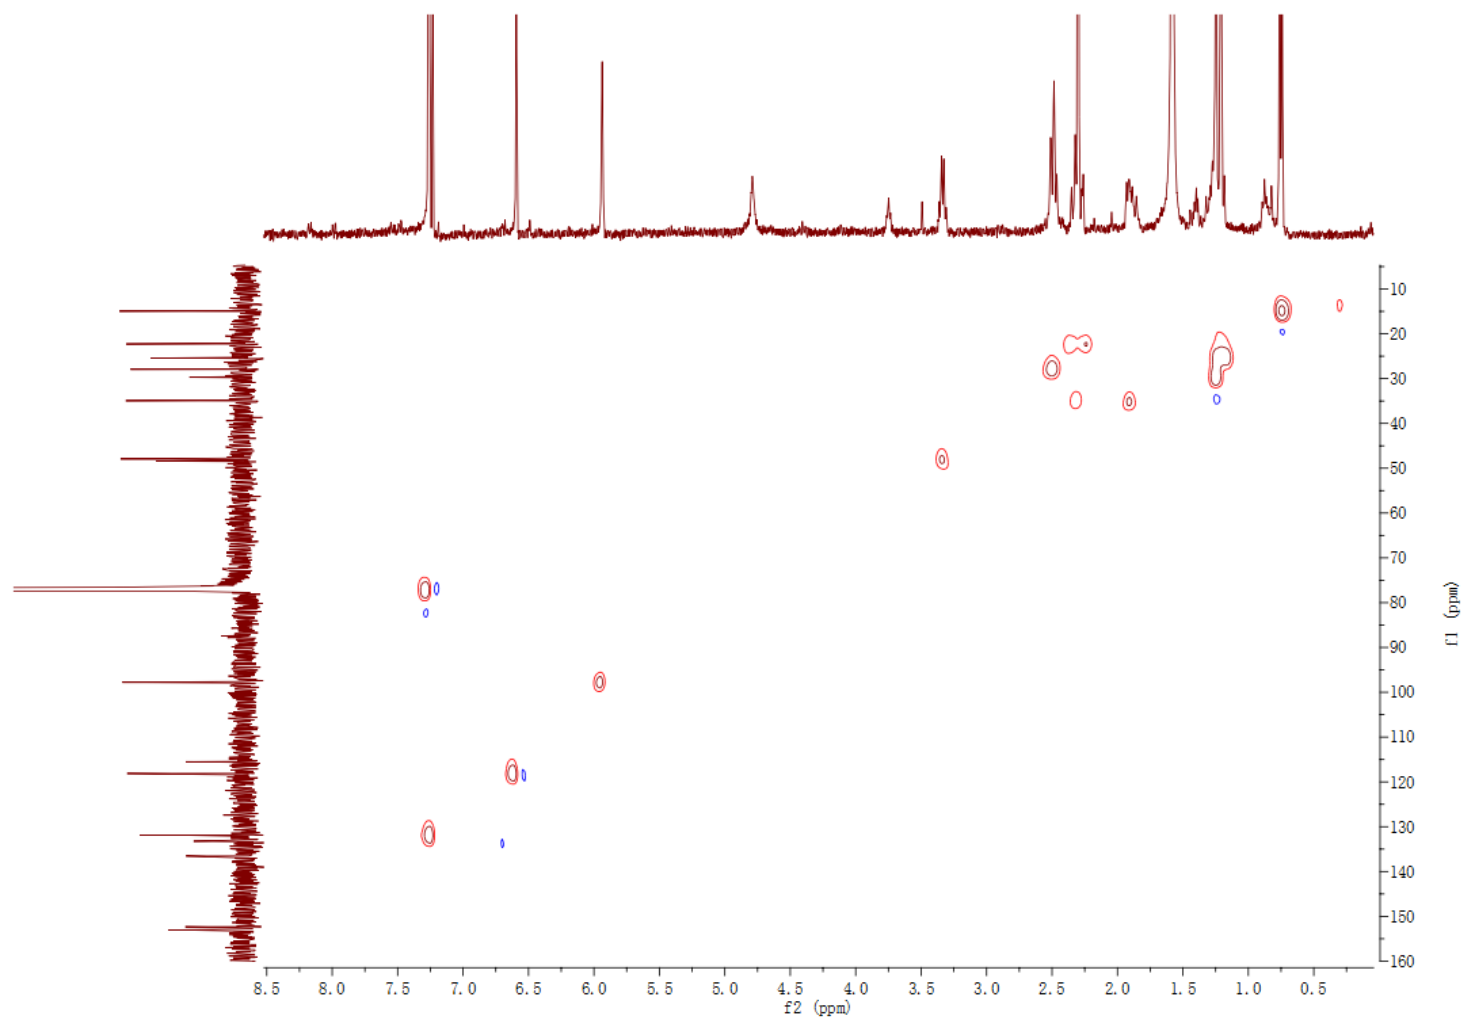

**Figure S29:** HMBC spectrum (500 MHz, CDCl<sub>3</sub>) of **4**.

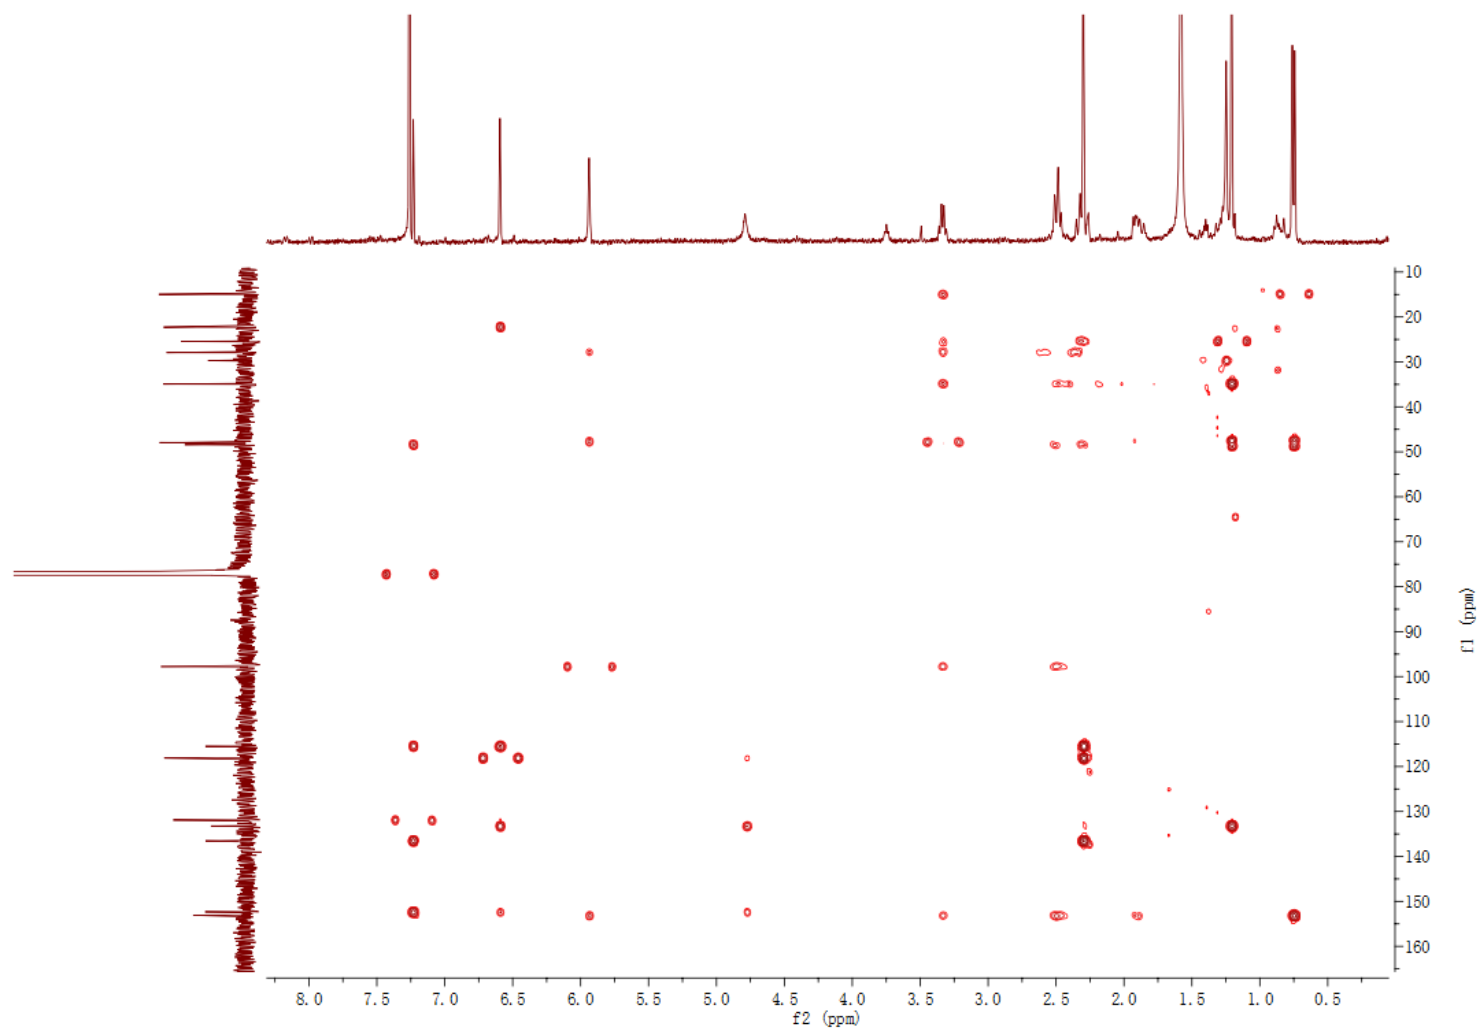



**Figure S30:** NOESY spectrum (500 MHz,  $\text{CDCl}_3$ ) of **4**.

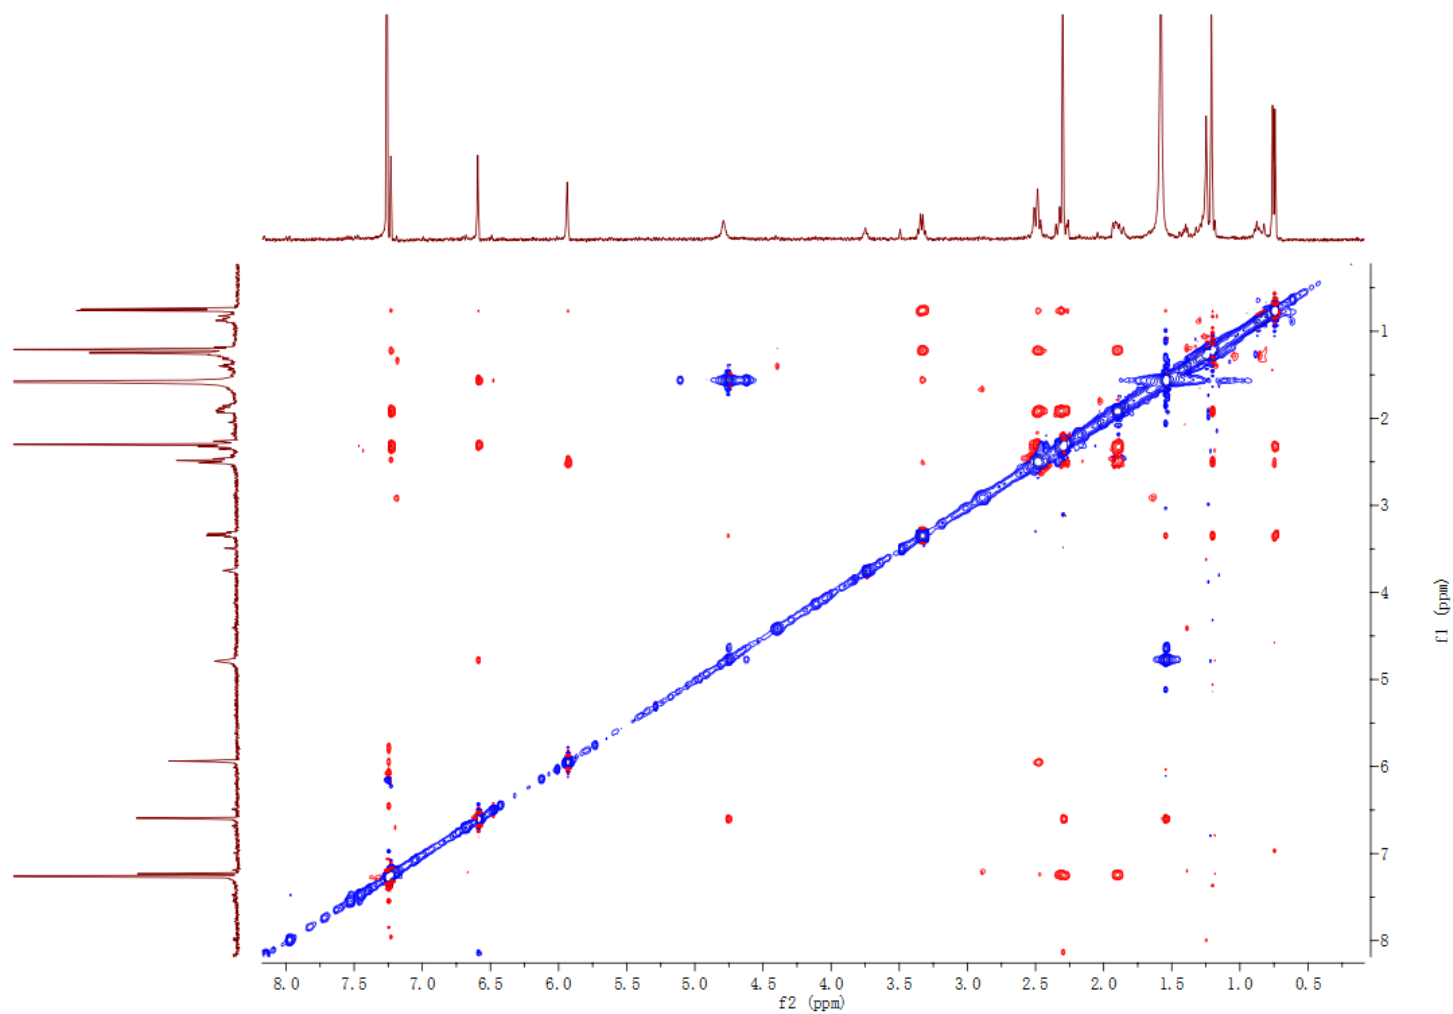

**Figure S31:** IR spectrum of **4**.

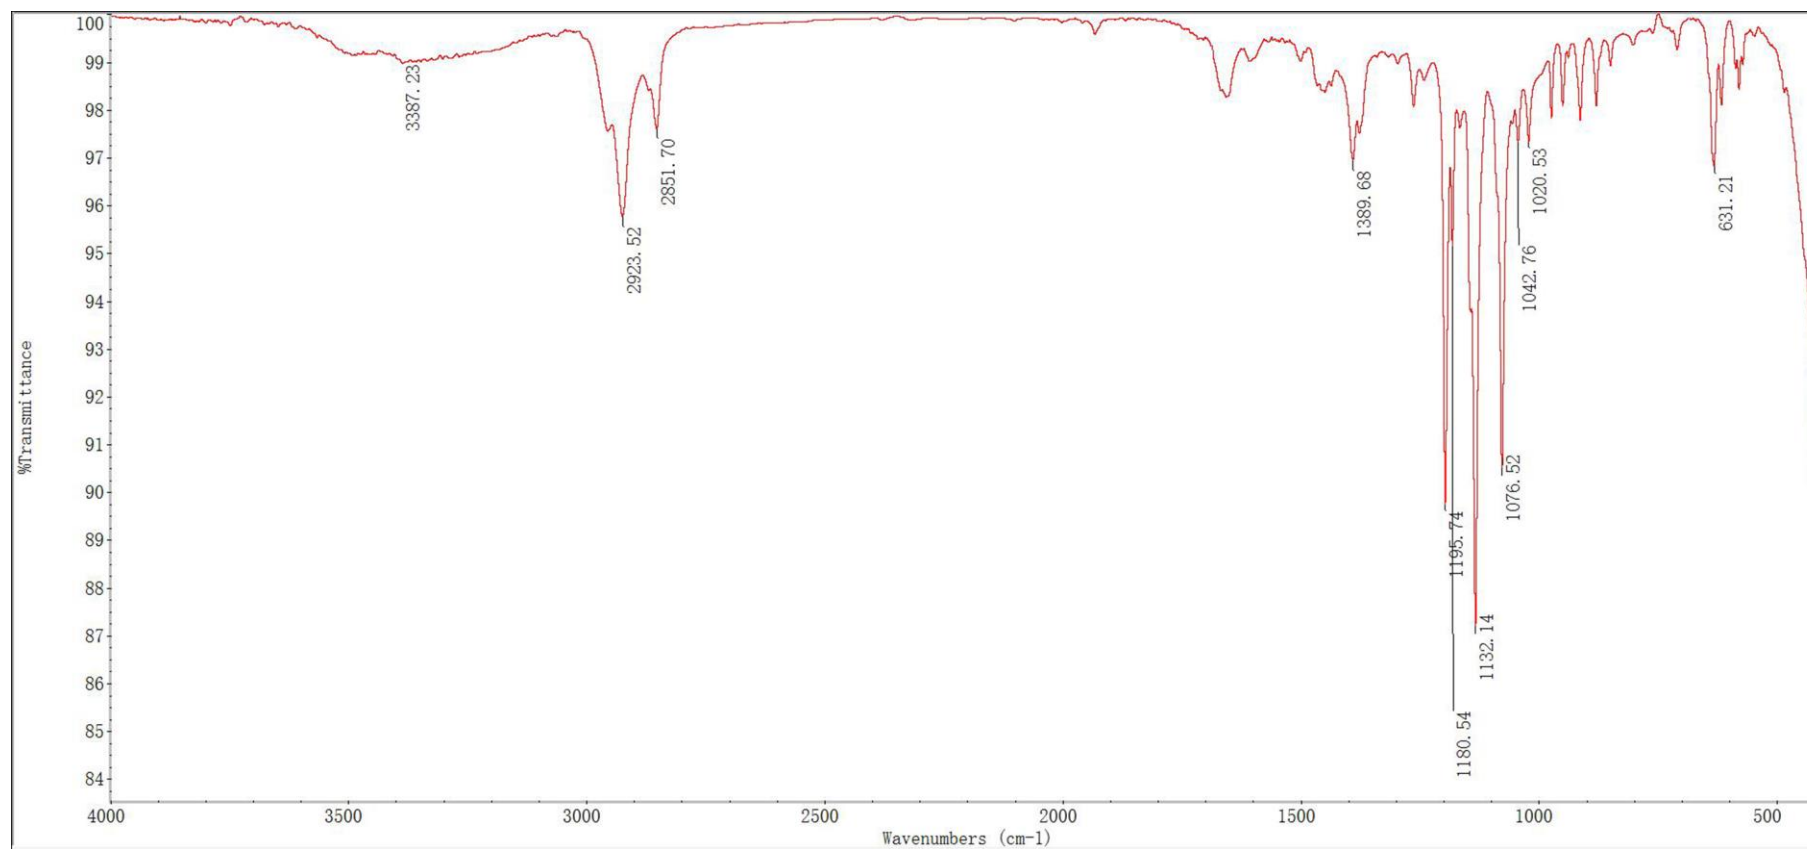

Figure S32: HR-ESIMS spectrum of 4.

## Elemental Composition Report

### Multiple Mass Analysis: 3 mass(es) processed

Tolerance = 20.0 PPM / DBE: min = -1.5, max = 50.0

Isotope cluster parameters: Separation = 1.0 Abundance = 1.0%

Monoisotopic Mass, Odd and Even Electron Ions

19 formula(e) evaluated with 1 results within limits (up to 20 closest results for each mass)

SIMM-Mass Spec

Q-ToF Ultima

30-Sep-2015

D4d

151298-1 98 (1.858) AM (Cen,4, 80.00, Ht,9000.0,384.93,0.70); Sm (SG, 2x1.00); Cm (98:120)

TOF MS ES-  
1.57e3

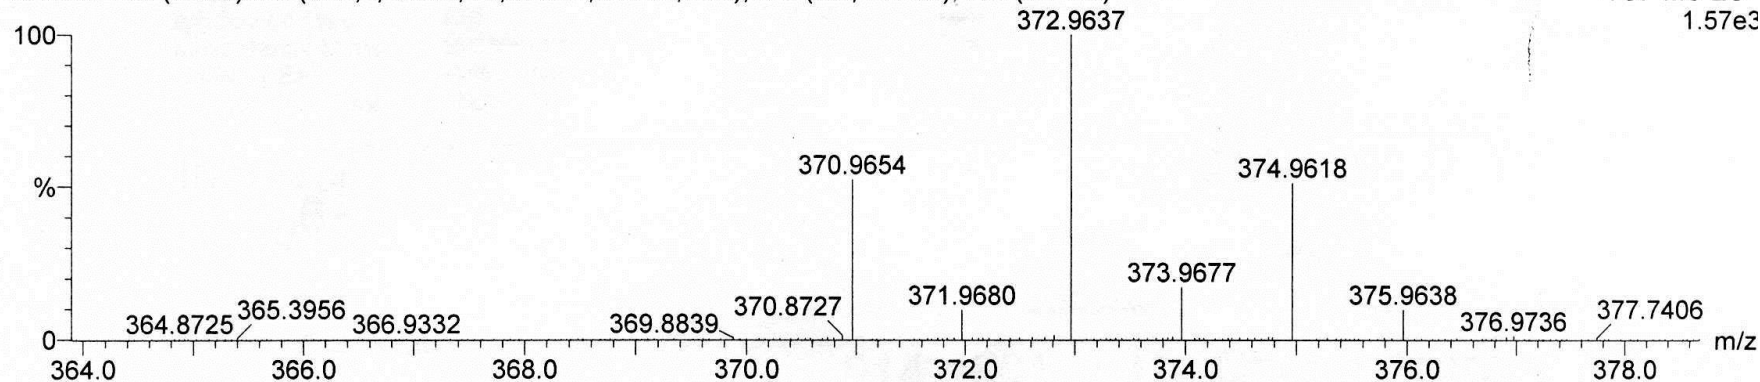

Minimum: 50.00  
Maximum: 100.00

200.0 20.0 -1.5 50.0

| Mass     | RA     | Calc. Mass | mDa | PPM | DBE | Score | Formula       |
|----------|--------|------------|-----|-----|-----|-------|---------------|
| 370.9654 | 52.30  | 370.9646   | 0.8 | 2.1 | 6.5 | 1     | C15 H17 O Br2 |
| 372.9637 | 100.00 | ---        |     |     |     |       |               |
| 374.9618 | 51.26  | ---        |     |     |     |       |               |

**Figure S33:**  $^1\text{H}$  NMR spectrum (500 MHz,  $\text{CDCl}_3$ ) of **6**.

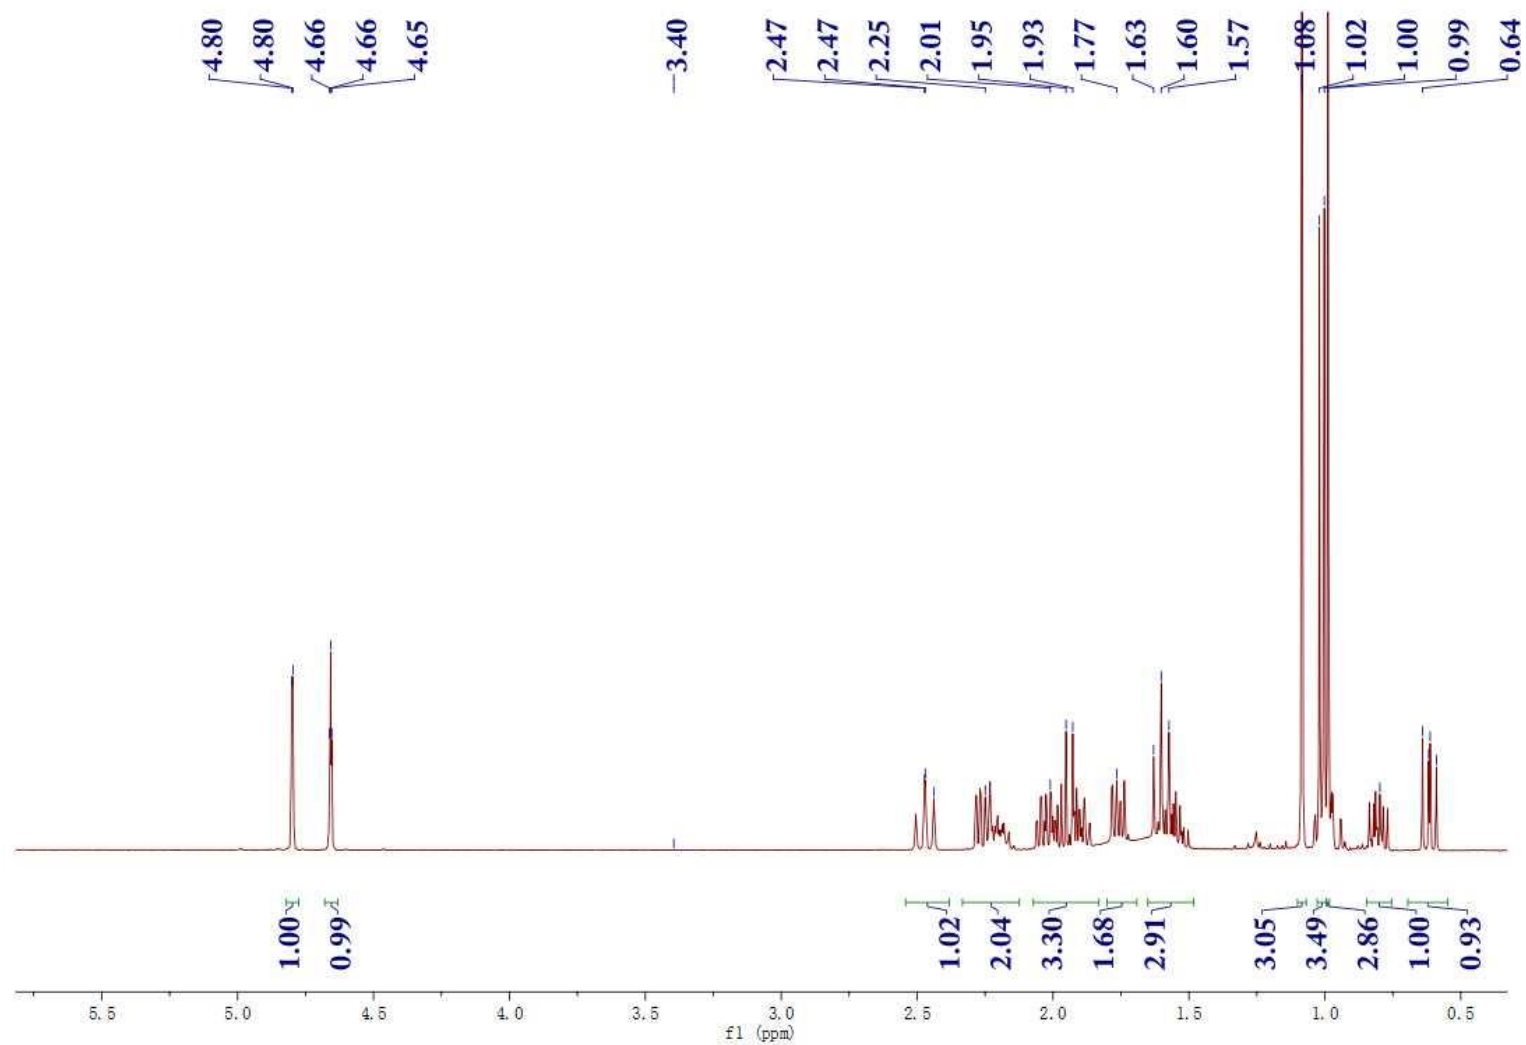

**Figure S34:**  $^{13}\text{C}$  NMR spectrum (125 MHz,  $\text{CDCl}_3$ ) of **6**.

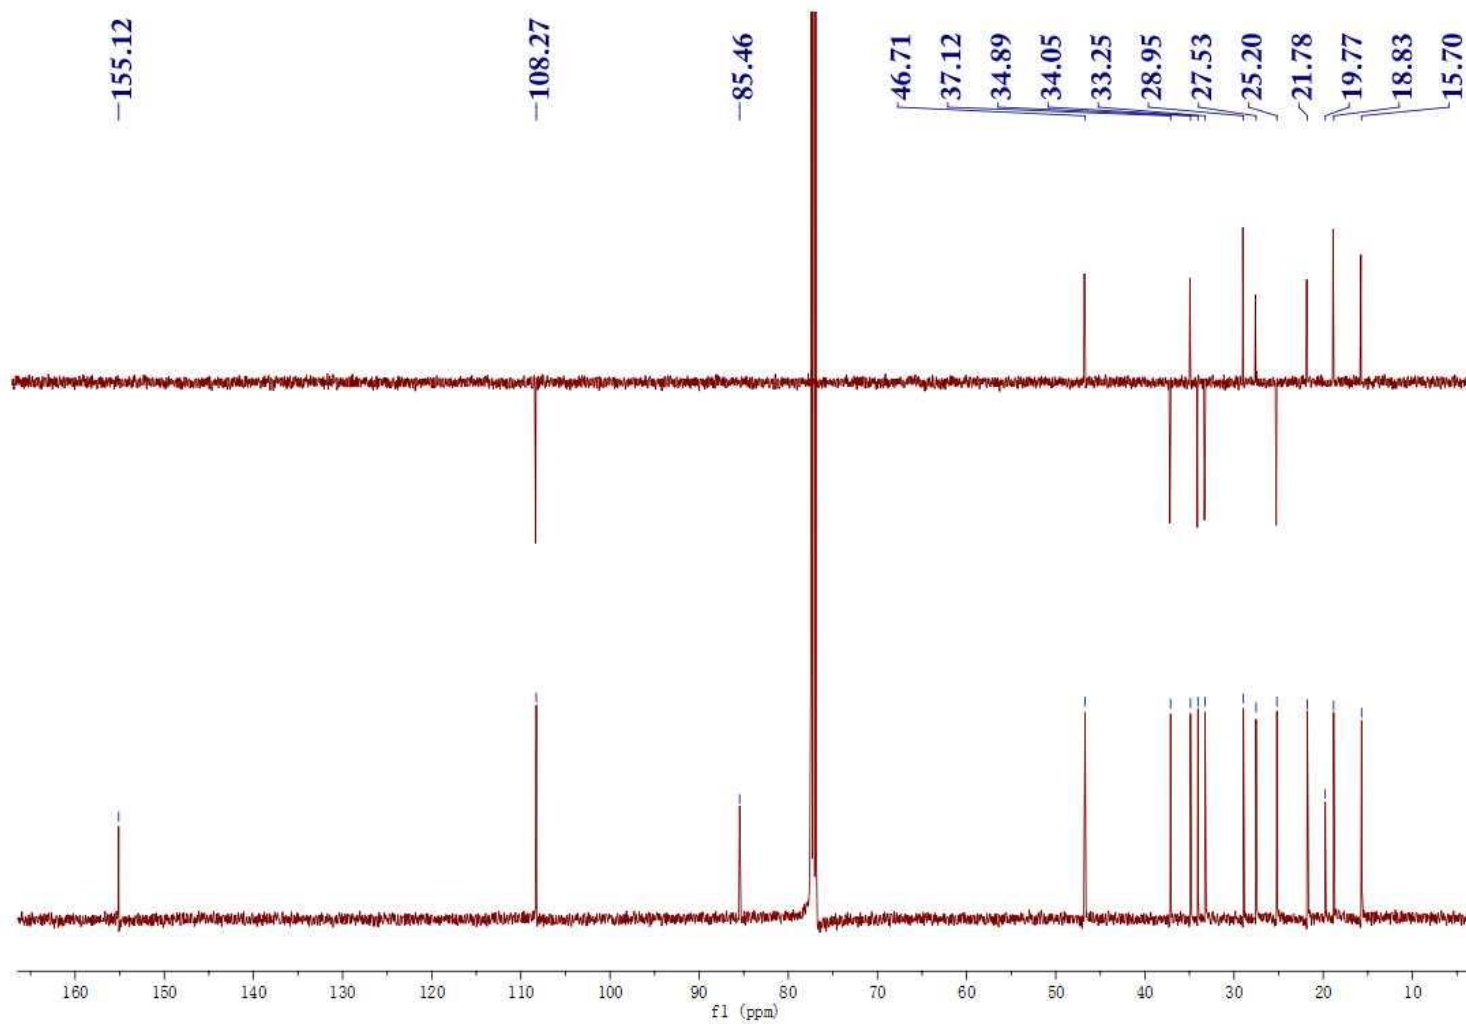

**Figure S35:**  $^1\text{H}$ ,  $^1\text{H}$  COSY spectrum (500 MHz,  $\text{CDCl}_3$ ) of **6**.

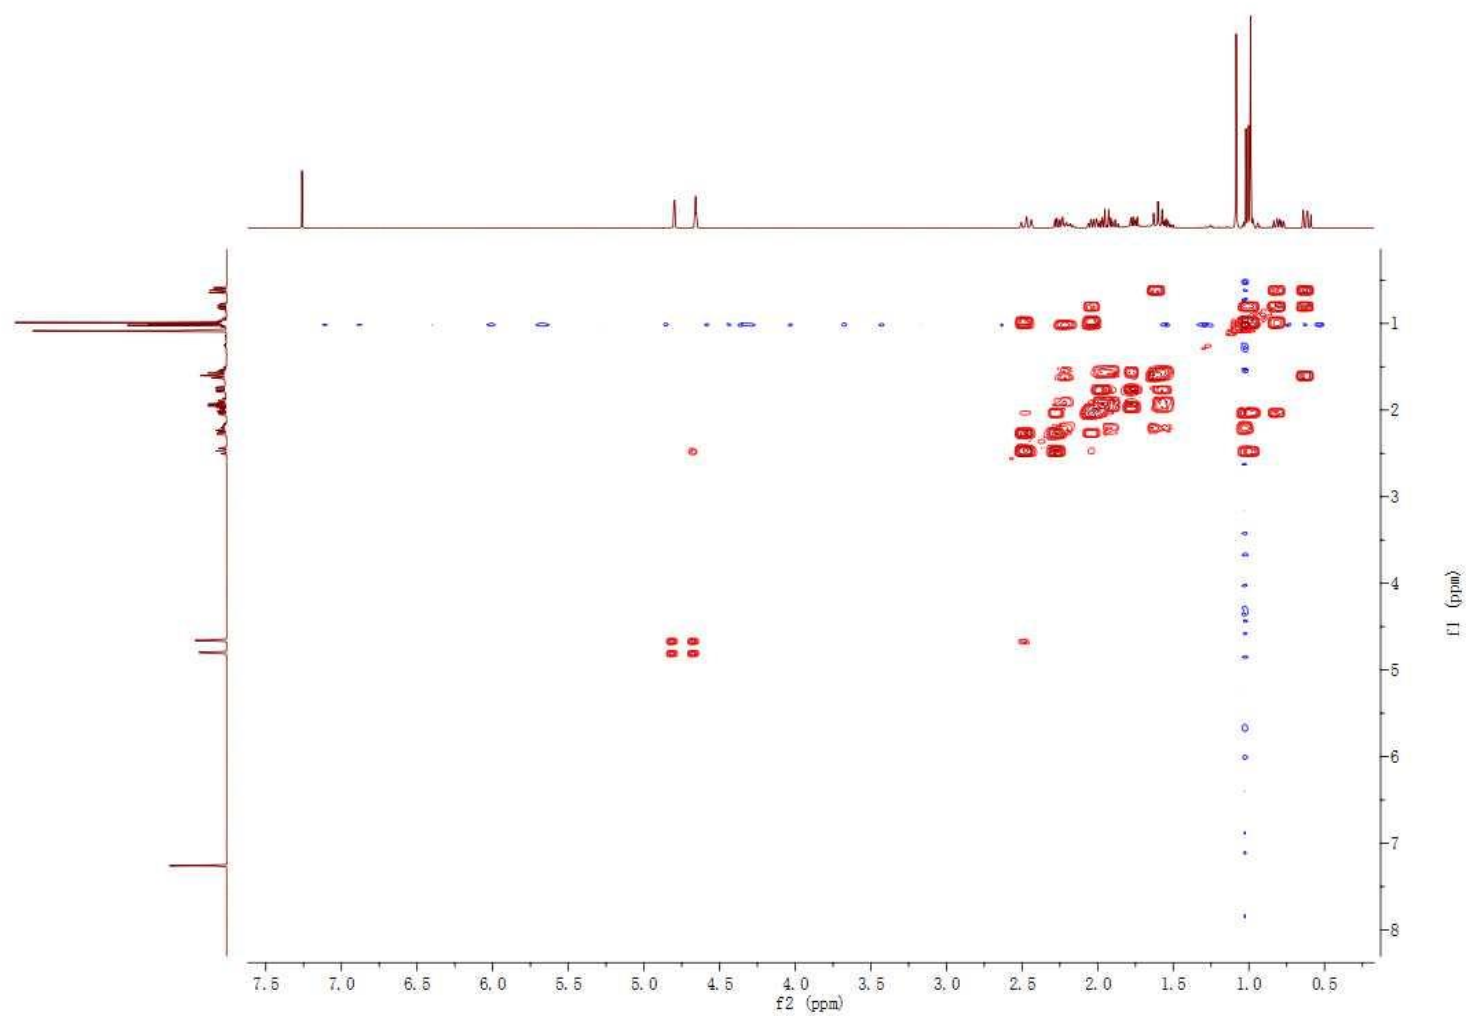

**Figure S36:** HMQC spectrum (500 MHz, CDCl<sub>3</sub>) of **6**.

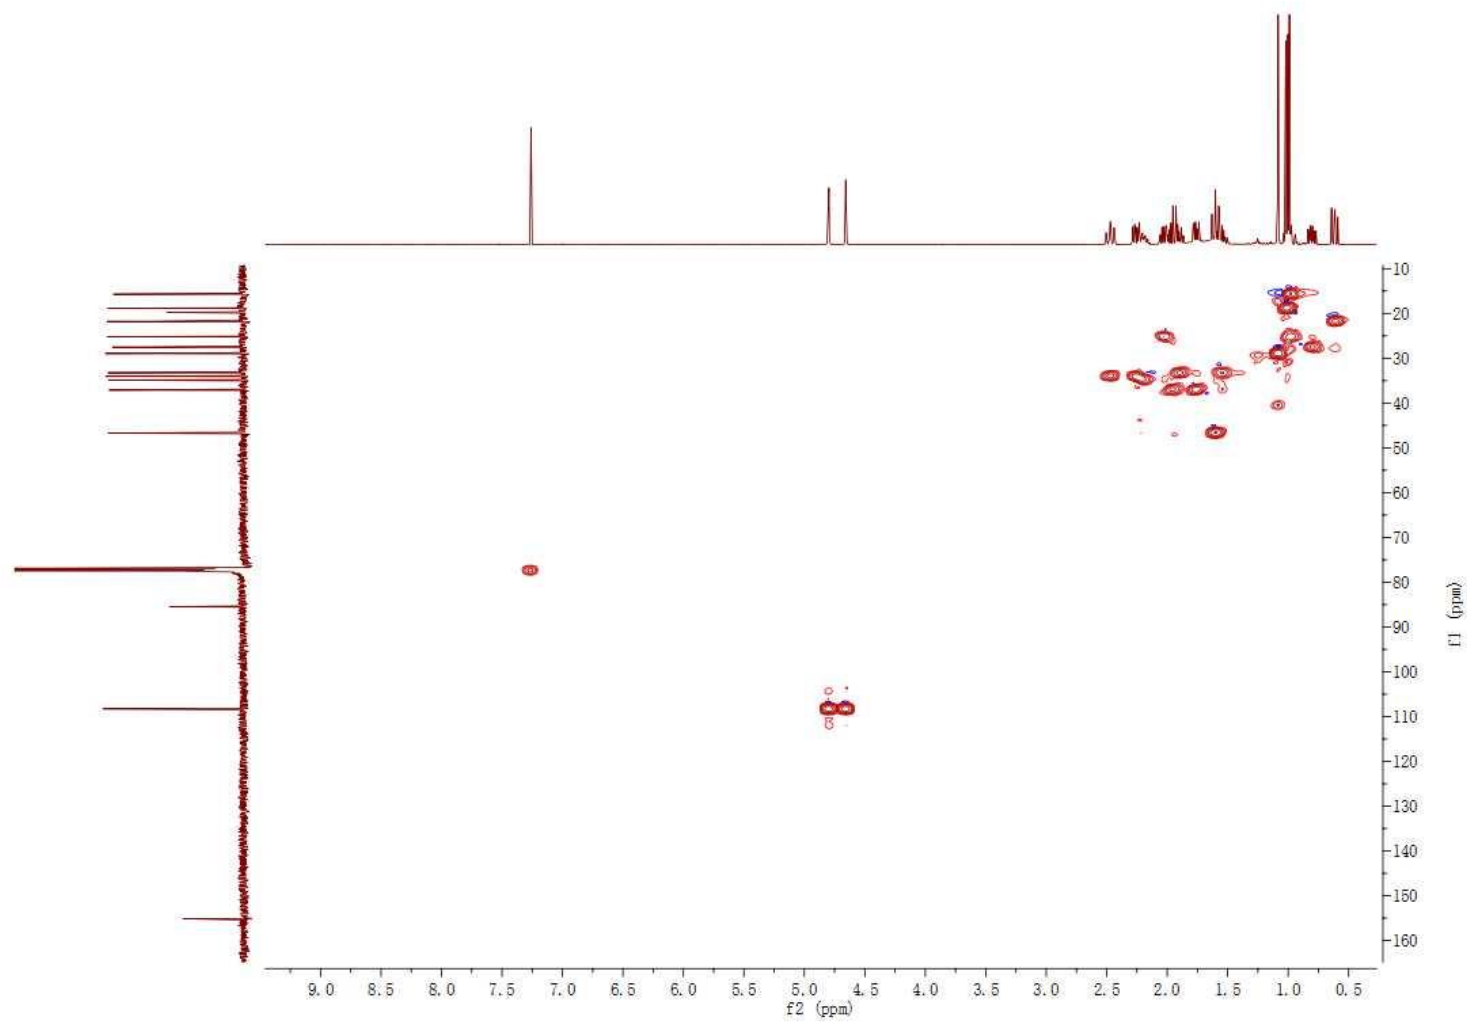

**Figure S37:** HMBC spectrum (500 MHz, CDCl<sub>3</sub>) of **6**.

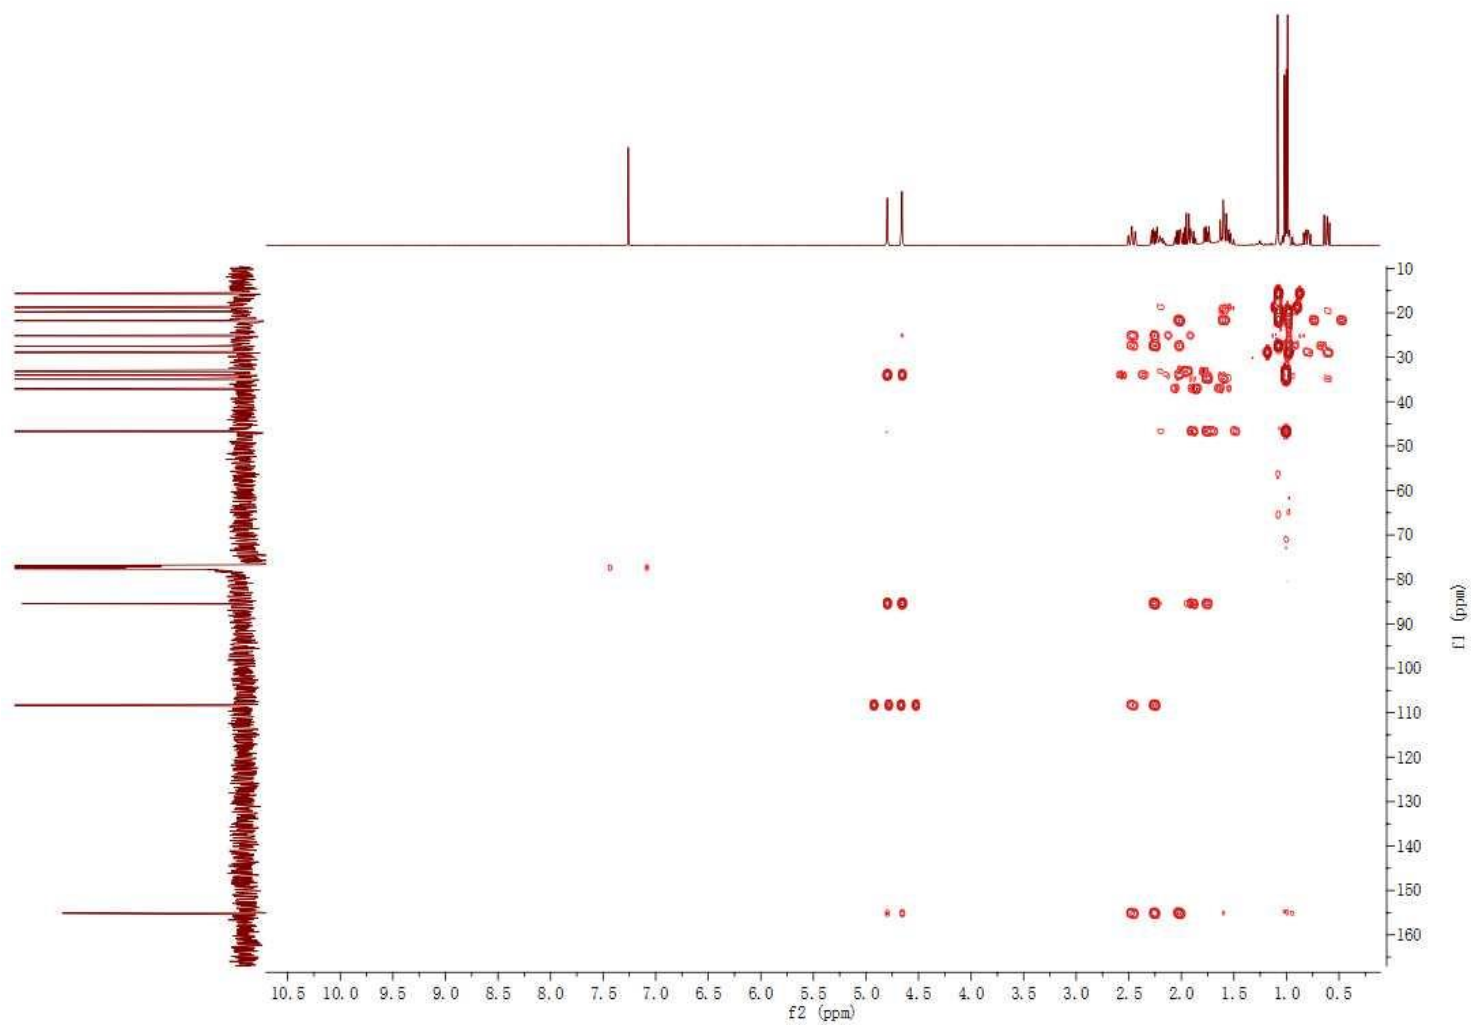



**Figure S38:** NOESY spectrum (500 MHz,  $\text{CDCl}_3$ ) of **6**.

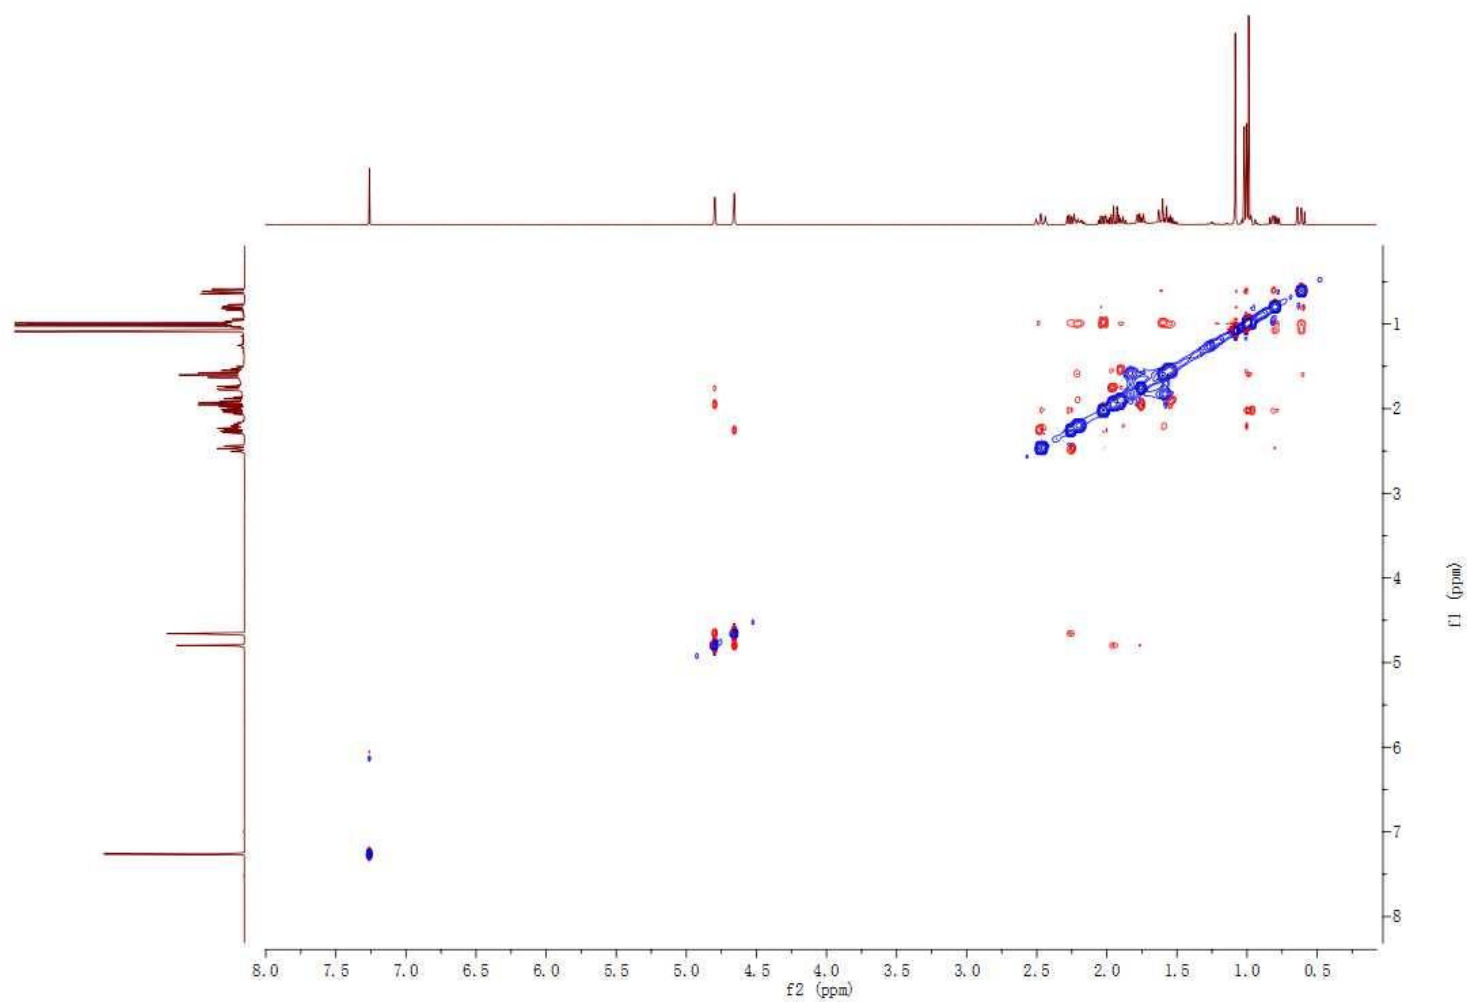

**Figure S39:** IR spectrum of **6**.

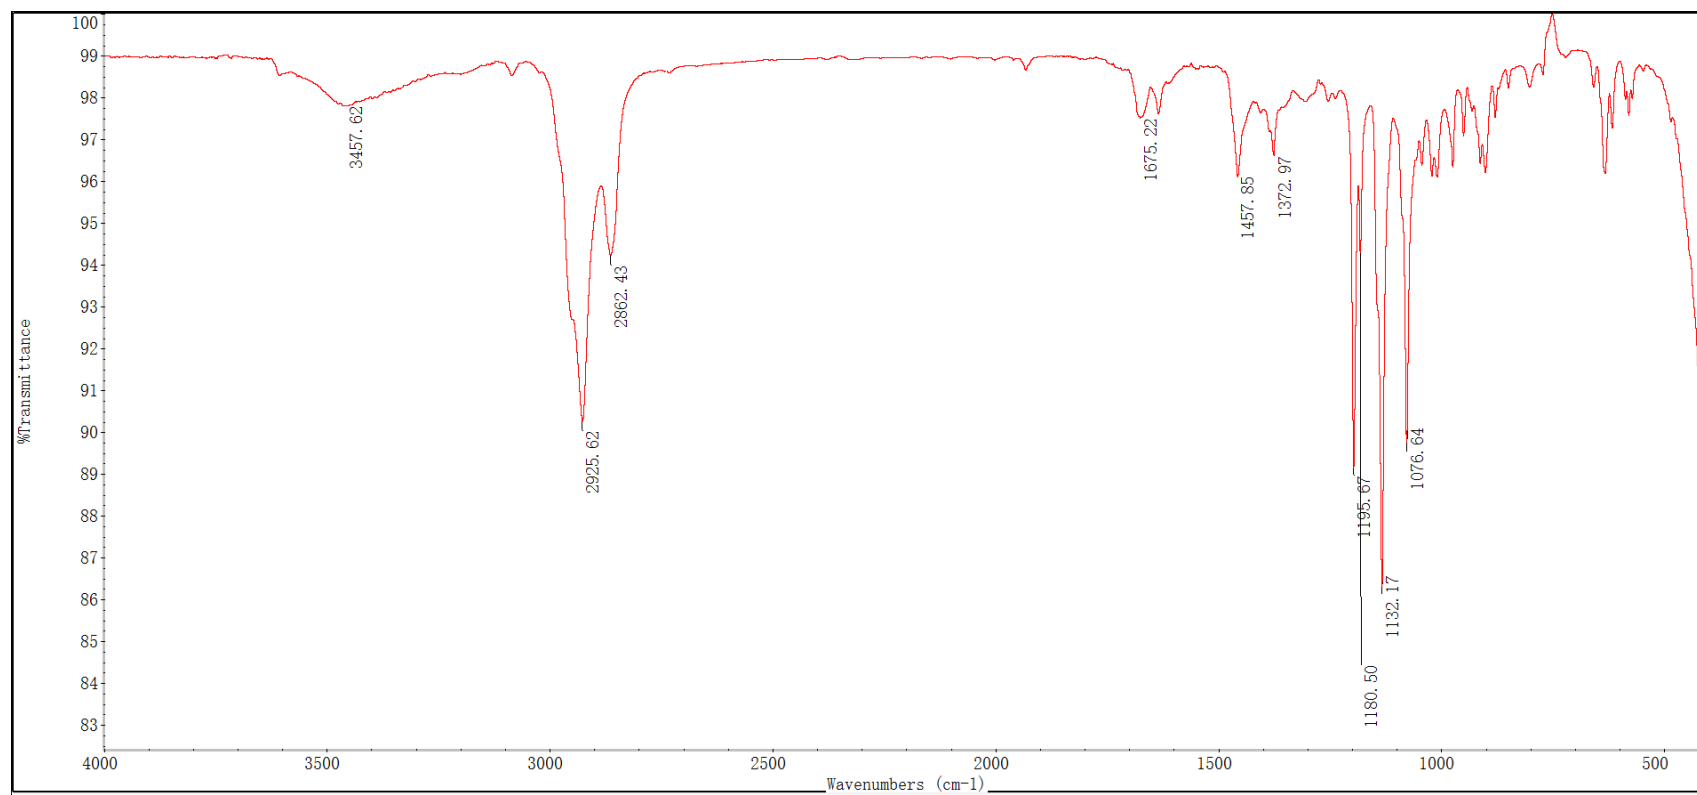

**Figure S40: HR-EIMS spectrum of 6.**

```

LIST: h16377-c1                      18-Sep-16  Elapse: 03:29.7    16
Samp: 21-F3b                          Start : 15:04:10    20
Comm: Finnigan/MAT95/70eV/R:10000
Mode: EI +VE +LMR BSCAN (EXP) UP HR NRM      Study : S/N: PT200712-01-01
Oper: SIMM.CAS Client: S/N: PT001263        Inlet :
Limit: ( 0 )
      : ( 321 ) C17.H100.0
Peak: 1000.00 mmu R+D: -2.0 > 60.0
Data: CMASS : converted

```

| Mass       | Intensity | %RA    | %RIC | Delta | R+D | Composition |
|------------|-----------|--------|------|-------|-----|-------------|
| 94.07697 * | 114418    | 8.47   | 0.35 | 1.3   | 3.0 | C7.H10      |
| 95.04998 * | 168308    | 12.45  | 0.51 | -0.3  | 3.5 | C6.H7.O     |
| 95.08616 * | 392362    | 29.03  | 1.20 | -0.1  | 2.5 | C7.H11      |
| 96.09313 * | 165239    | 12.23  | 0.50 | 0.8   | 2.0 | C7.H12      |
| 97.06499 * | 94503     | 6.99   | 0.29 | 0.3   | 2.5 | C6.H9.O     |
| 97.10086 * | 98786     | 7.31   | 0.30 | 0.9   | 1.5 | C7.H13      |
| 105.0674 * | 786509    | 58.19  | 2.40 |       |     |             |
| 106.0737 * | 154461    | 11.43  | 0.47 |       |     |             |
| 107.0463 * | 84653     | 6.26   | 0.26 |       |     |             |
| 107.0830 * | 646823    | 47.86  | 1.97 |       |     |             |
| 108.0891 * | 131762    | 9.75   | 0.40 |       |     |             |
| 109.0624 * | 259600    | 19.21  | 0.79 | 3.0   | 3.5 | C7.H9.O     |
| 109.0992 * | 231620    | 17.14  | 0.71 | 2.6   | 2.5 | C8.H13      |
| 115.0533 * | 148393    | 10.98  | 0.45 | 1.5   | 6.5 | C9.H7       |
| 117.0692 * | 461027    | 34.11  | 1.40 | 1.3   | 5.5 | C9.H9       |
| 118.0758 * | 97430     | 7.21   | 0.30 | 2.5   | 5.0 | C9.H10      |
| 119.0853 * | 447680    | 33.12  | 1.36 | 0.8   | 4.5 | C9.H11      |
| 120.0926 * | 237830    | 17.60  | 0.72 | 1.3   | 4.0 | C9.H12      |
| 121.0652 * | 133832    | 9.90   | 0.41 | 0.2   | 4.5 | C8.H9.O     |
| 121.1013 * | 417915    | 30.92  | 1.27 | 0.5   | 3.5 | C9.H13      |
| 122.0724 * | 141684    | 10.48  | 0.43 | 0.8   | 4.0 | C8.H10.O    |
| 122.1089 * | 293219    | 21.70  | 0.89 | 0.7   | 3.0 | C9.H14      |
| 123.0793 * | 213847    | 15.82  | 0.65 | 1.7   | 3.5 | C8.H11.O    |
| 123.1155 * | 122269    | 9.05   | 0.37 | 1.8   | 2.5 | C9.H15      |
| 125.0956 * | 174232    | 12.89  | 0.53 | 1.1   | 2.5 | C8.H13.O    |
| 128.0628 * | 110492    | 8.18   | 0.34 | -0.2  | 7.0 | C10.H8      |
| 129.0699 * | 141184    | 10.45  | 0.43 | 0.5   | 6.5 | C10.H9      |
| 131.0864 * | 642326    | 47.53  | 1.96 | -0.3  | 5.5 | C10.H11     |
| 132.0922 * | 123483    | 9.14   | 0.38 | 1.7   | 5.0 | C10.H12     |
| 133.1020 * | 352676    | 26.09  | 1.07 | -0.3  | 4.5 | C10.H13     |
| 134.1082 * | 147965    | 10.95  | 0.45 | 1.3   | 4.0 | C10.H14     |
| 135.0805 * | 132119    | 9.78   | 0.40 | 0.5   | 4.5 | C9.H11.O    |
| 135.1166 * | 214632    | 15.88  | 0.65 | 0.8   | 3.5 | C10.H15     |
| 137.0962 * | 134118    | 9.92   | 0.41 | 0.4   | 3.5 | C9.H13.O    |
| 138.1038 * | 135189    | 10.00  | 0.41 | 0.7   | 3.0 | C9.H14.O    |
| 144.0939 * | 88650     | 6.56   | 0.27 | 0.0   | 6.0 | C11.H12     |
| 145.1017 * | 654318    | 48.41  | 1.99 | 0.0   | 5.5 | C11.H13     |
| 146.1076 * | 205495    | 15.20  | 0.63 | 2.0   | 5.0 | C11.H14     |
| 147.1169 * | 270164    | 19.99  | 0.82 | 0.5   | 4.5 | C11.H15     |
| 149.0965 * | 252962    | 18.72  | 0.77 | 0.2   | 4.5 | C10.H13.O   |
| 149.1327 * | 110349    | 8.16   | 0.34 | 0.4   | 3.5 | C11.H17     |
| 150.1034 * | 206780    | 15.30  | 0.63 | 1.1   | 4.0 | C10.H14.O   |
| 151.1124 * | 343254    | 25.40  | 1.05 | -0.1  | 3.5 | C10.H15.O   |
| 159.1175 * | 1351534   | 100.00 | 4.12 | -0.2  | 5.5 | C12.H15     |
| 160.1226 * | 282655    | 20.91  | 0.86 | 2.6   | 5.0 | C12.H16     |
| 161.1323 * | 115488    | 8.54   | 0.35 | 0.7   | 4.5 | C12.H17     |
| 162.1403 * | 100142    | 7.41   | 0.31 | 0.5   | 4.0 | C12.H18     |
| 163.1123 * | 367665    | 27.20  | 1.12 | 0.0   | 4.5 | C11.H15.O   |
| 164.1190 * | 122198    | 9.04   | 0.37 | 1.1   | 4.0 | C11.H16.O   |
| 173.1331 * | 84582     | 6.26   | 0.26 | 0.0   | 5.5 | C13.H17     |
| 177.1277 * | 442540    | 32.74  | 1.35 | 0.2   | 4.5 | C12.H17.O   |
| 178.1343 * | 101927    | 7.54   | 0.31 | 1.5   | 4.0 | C12.H18.O   |
| 187.1492 * | 576802    | 42.68  | 1.76 | -0.5  | 5.5 | C14.H19     |
| 191.1438 * | 132548    | 9.81   | 0.40 | -0.2  | 4.5 | C13.H19.O   |
| 202.1720 * | 551748    | 40.82  | 1.68 | 0.2   | 5.0 | C15.H22     |
| 205.1585 * | 273661    | 20.25  | 0.83 | 0.7   | 4.5 | C14.H21.O   |
| 220.1824 * | 240756    | 17.81  | 0.73 | 0.3   | 4.0 | C15.H24.O   |
